1 **TgCentrin2 is required for invasion and replication in the human parasite**

2 *Toxoplasma gondii*

3

4 *Jacqueline M. Leung<sup>1\*</sup>, Jun Liu<sup>1\*</sup>, Laura A. Wetzel<sup>1,2</sup>, Ke Hu<sup>1#</sup>*

5 *<sup>1</sup>Department of Biology, Indiana University, Bloomington, IN, 47405, USA*

6 *<sup>2</sup>Current address: Department of Molecular and Cellular Biology, University of*

7 *California, Berkeley, CA, 94720, USA*

8

9 *\*: These authors contributed equally to this work.*

10

11

12 *Running title: TgCentrin2 is required for parasite invasion and replication*

13 *#: Address correspondence to:*

14 *Email: kehu@indiana.edu*

15

16

17 **Abstract**

18

19 Centriins are EF-hand containing proteins ubiquitously found in eukaryotes and are key  
20 components of centrioles/basal bodies as well as certain contractile fibers. We previously  
21 identified three centriins in the human parasite *Toxoplasma gondii*, all of which localized  
22 to the centrioles. However, one of them, TgCentrin2 (CEN2), is also targeted to  
23 structures at the apical and basal ends of the parasite, as well as to annuli at the base of  
24 the apical cap of the membrane cortex. The role(s) that TgCentrin2 plays in these  
25 locations was unknown. Here we report the functional characterization of TgCentrin2  
26 using a conditional knockdown method that combines transcriptional and protein stability  
27 control. The knockdown resulted in an ordered loss of TgCentrin2 from its four  
28 compartments, due to differences in incorporation kinetics and structural inheritance over  
29 successive generations. This was correlated with a major invasion deficiency at early  
30 stages of *TgCentrin2* knockdown, and replication defects at later stages. These results  
31 indicate that TgCentrin2 is incorporated into multiple cytoskeletal structures to serve  
32 distinct functions in *T. gondii* required for parasite survival.

33

34

35

36

## 37 INTRODUCTION

38

39 Centrin-like proteins were first discovered in the ciliated protozoan *Zoothamnium*  
40 *geniculatum* as a component of the spasmoneme, an organelle that contracts in response  
41 to calcium binding (Amos et al., 1975). Subsequently, centrinins were found to be  
42 components of the centrioles/basal bodies and to play an important role in regulating  
43 centrosomal duplication, and flagellar biogenesis and function in the cells of many  
44 animals and protozoa (Salisbury, 1995; Salisbury, 2007; Sanders and Salisbury, 1994;  
45 Wright et al., 1985).

46

47 We previously identified three centrinins in *Toxoplasma gondii*, a human parasite  
48 that causes devastating toxoplasmic encephalitis in immunocompromised individuals and  
49 unprotected fetuses. As with canonical centrinins in other systems, TgCentrin 1 and 3  
50 (CEN1 and 3) are predominantly localized to the centrioles. Although TgCentrin2  
51 (CEN2) shares a high degree of sequence similarity with CEN1 and 3 (Figure 1A), its  
52 localization is remarkably different (Hu et al., 2006). In addition to the centrioles,  
53 ectopically expressed CEN2 tagged with eGFP also localized to three other structures: a  
54 ring-shaped complex at the apex of the parasite (the preconoidal rings), a capping  
55 structure at the basal end (the basal complex), as well as ~5-6 peripheral annuli located  
56 approximately one-quarter of a parasite length below the apex (Hu et al., 2006) (Figure  
57 1B). The location of the CEN2 annuli coincides with the boundary between the apical  
58 cap and the rest of the parasite membrane cortex, as marked by the ISP proteins (Beck et  
59 al., 2010).

60

61 We were interested in understanding what function(s) CEN2 plays in the four  
62 distinct structures that it targets. After many failed attempts with established gene  
63 manipulation approaches to delete the *CEN2* gene or downregulate its expression, we  
64 knocked down *CEN2* expression in *Toxoplasma* using a dual-regulation approach that  
65 combines anhydrotetracycline (ATc)-mediated transcription suppression and ddFKBP-  
66 mediated protein degradation. We discovered that CEN2 was depleted from its four  
67 locations with different kinetics. The loss of CEN2 from the two more apically located  
68 structures, the preconoidal rings and peripheral annuli, occurred earlier, followed by  
69 significant CEN2 depletion from the centrioles and basal complex. This was correlated  
70 with a major inhibition of parasite invasion evident at early stages of *CEN2* knockdown  
71 followed by replication defects that developed at later stages. This suggests that CEN2 is  
72 critical for multiple aspects of the parasite lytic cycle and that its associated structures  
73 comprise potential targets for anti-parasitic measures.

74

75

## 76 RESULTS

77

### 78 *The localization of CEN2 in eGFP-CEN2 knock-in parasites*

79 In the previous studies, the localization of CEN2 was characterized by ectopic  
80 expression. To confirm its localization pattern, we replaced the endogenous *CEN2* gene  
81 with *eGFP-CEN2* using homologous recombination. The resulting *eGFP-CEN2* knock-  
82 in parasite line shows that CEN2 is localized to the preconoidal rings, peripheral annuli,

83 centrioles, and basal complex (Figure 1B-G), the same pattern as ectopically expressed  
84 eGFP-CEN2 (Hu, 2008; Hu et al., 2006). Figure 1C-G includes images of parasites at  
85 different stages of cell division – a “born-within” type of replication (Hu et al., 2002;  
86 Nishi et al., 2008; Sheffield and Melton, 1968) – during which the cortical cytoskeleton  
87 of the daughter parasite is built inside the mother. Of the CEN2-containing structures,  
88 duplication of the centrioles occurs first (Figure 1D, inset), followed by construction of  
89 the pre-conoidal rings (Figure 1E), and then the peripheral annuli, which appear after the  
90 ISP1 cap is assembled (Figure 1F&G). Recruitment of CEN2 to the daughter basal  
91 complex becomes evident only at a late stage of daughter assembly (Figure 1G).

#### 92 *Unsuccessful attempts to generate CEN2 knockout and knockdown mutants using several* 93 *established methods*

94 In the knock-in line, the *eGFP-CEN2* coding sequence and the *HXGPRT* drug selection  
95 cassette are flanked with *LoxP* sites, which allows for the excision of this locus upon  
96 transfection with Cre recombinase-expressing plasmids. Indeed, significant loss of  
97 eGFP-CEN2 fluorescence was observed in many parasites ~48 h after Cre transfection  
98 (Figure 1H). However, numerous attempts to isolate *CEN2* knockout clones failed. We  
99 also failed to recover *CEN2* knockout clones using a CRISPR-Cas9 based gene deletion  
100 strategy (data not shown), suggesting that the complete loss of *CEN2* results in lethality.  
101 This result is consistent with the fitness score for *CEN2* (-4.4) obtained by (Sidik et al.,  
102 2016).

103  
104  
105 The functions of many presumed essential genes have been characterized using  
106 the anhydrotetracycline (ATc)-based knockdown method (Meissner et al., 2001;  
107 Meissner et al., 2002; Mital et al., 2005). Therefore, we attempted to regulate *CEN2*  
108 expression by generating a line in which the expression of *mAppleFP-CEN2* was driven  
109 by the TetO7Sag4 promoter and could be downregulated with ATc, which binds to the  
110 tetracycline-inducible transactivator (TATi) to inhibit transcription initiation by the  
111 promoter. We found that while the ATc treatment significantly downregulated  
112 *mAppleFP-CEN2* expression in the initial passages, the ATc control of *CEN2* expression  
113 waned considerably over time (data not shown), indicating that ATc-based transcriptional  
114 control alone is not sufficient to maintain robust regulation of *CEN2* expression.

#### 115 *Combining transcriptional and translational controls allow for more robust and stable* 116 *knockdown of CEN2*

117 To achieve tighter regulation of *CEN2* expression, we combined the ATc transcriptional  
118 regulation system with translational control. Specifically, the *eGFP-CEN2* knock-in  
119 parasites were stably transfected with a plasmid that contains a *ddFKBP-mAppleFP-*  
120 *CEN2* expression cassette controlled by the TetO7Sag4 promoter, as well as an  
121 expression cassette for TATi (*eGFP-CEN2* knock-in: *ddFKBP-mAppleFP-CEN2* cKD  
122 parasites, referred to as “KI:cKD” for simplicity). Upon excision of *eGFP-CEN2* from  
123 the endogenous locus by transient Cre recombinase expression, clones (*ddFKBP-*  
124 *mAppleFP-CEN2* cKD parasites, referred to as “cKD”) were isolated and maintained in  
125 the presence of Shield-1 (Shld1), which binds to and stabilizes the ddFKBP domain, thus  
126 blocking degradation of ddFKBP-mAppleFP-CEN2 (Figure 2). The cellular level of  
127 ddFKBP-mAppleFP-CEN2 from the TetO7Sag4 promoter therefore can be controlled not  
128 only with ATc (regulating transcription), but also with Shld1, the absence of which leads  
129

130 to proteasome-mediated degradation of the fusion protein (Banaszynski et al., 2006;  
131 Herm-Gotz et al., 2007). Figure 3A shows that ddfFKBP-mAppleFP-CEN2 correctly  
132 localized to all of the CEN2-containing structures, and downregulation of ddfFKBP-  
133 mAppleFP-CEN2 expression was achieved by withdrawing Shld1 from the culture and  
134 adding ATc (-Shld1/+ATc) to a final concentration of 270 nM. To measure the kinetics  
135 of CEN2 loss, images of vacuoles that contained two to eight parasites were captured  
136 after 12 to 120 h of Shld1 withdrawal and ATc treatment, and mAppleFP fluorescence  
137 signals in the preconoidal rings, peripheral annuli, centriole(s), and basal complex were  
138 quantified. While Shld1 withdrawal alone (-Shld1/-ATc) resulted in a modest reduction  
139 of the mAppleFP-CEN2 signal in the preconoidal rings and annuli, CEN2 localization in  
140 these structures became undetectable twelve hours after Shld1 withdrawal and ATc  
141 addition (-Shld1/+ATc) (Figure 3B). The depletion kinetics for CEN2 in the centrioles  
142 and the basal complex were very different. Withdrawal of Shld1 alone (-Shld1/-ATc) did  
143 not result in a significant decrease of the mAppleFP signal in these structures. After 12 h  
144 of -Shld1/+ATc treatment, the level of mAppleFP was  $\sim 42 \pm 2\%$  (centrioles) and  $54 \pm$   
145  $5\%$  (basal complex) of the fluorescence in the corresponding structures in cKD parasites  
146 without downregulation [Figure 3B, "Baseline" (+Shld1/-ATc)], and  $\sim 12 \pm 1\%$   
147 (centrioles) and  $\sim 10 \pm 3\%$  (basal complex) by 48 h. This low level of mAppleFP-CEN2  
148 signal remained detectable even after 120 h of ATc treatment (Figure 3B). As it is  
149 unlikely that a protein can persist for  $\sim 15$ -20 generations of the parasite [The parasite  
150 doubling time has been estimated to be  $\sim 6$ -8 h (Black and Boothroyd, 2000)], this  
151 lingering signal might reflect a residual level of continuing CEN2 synthesis. We  
152 observed a similar ordered and differential loss of eGFP-CEN2 from the four  
153 compartments in our attempts to generate *CEN2* knockout mutants using the Cre-LoxP  
154 based method (Figure 1H).

#### 155 156 *The role of structural inheritance in the differential depletion of CEN2 from the four* 157 *compartments*

158 As shown in Figure 1D-G, the daughter cortical cytoskeleton is built anew inside the  
159 mother during the replication of *Toxoplasma* and other apicomplexan parasites, but some  
160 cytoskeletal structures, such as the centrioles, are replicated and inherited from the  
161 mother (Hu, 2008; Hu et al., 2002). The kinetics of depletion for a protein component  
162 from a structure are therefore affected by the synthesis of new protein, the dissociation  
163 and degradation rates of pre-existing protein, "dilution" of a finite amount of protein over  
164 successive rounds of cellular replication, as well as whether the structure itself is  
165 synthesized *de novo* or inherited from the mother. To determine the effect of structural  
166 inheritance on CEN2 depletion from the four compartments during knockdown, cKD  
167 parasites maintained in Shld1 were allowed to invade, Shld1 was then further maintained,  
168 or withdrawn and 270 nM ATc was added to downregulate ddfFKBP-mAppleFP-CEN2  
169 for 14 h. Vacuoles containing a single parasite before or undergoing cytokinesis (*i.e.*  
170 before completion of the first round of replication post-invasion) were examined. In  
171 contrast to cKD parasites maintained in Shld1 where the mAppleFP signal was prominent  
172 in all CEN2-containing structures (Figure 3C, +Shld1/-ATc), the ATc-treated parasites  
173 assembled daughters with CEN2 that was invariably undetectable in the preconoidal rings  
174 and peripheral annuli but prominent in the duplicated centrioles and the basal complex  
175 (Figure 3C, -Shld1/+ATc). In some instances, the daughters emerged in an orientation

176 that permitted observation of mAppleFP signal still present in the preconoidal rings and  
177 peripheral annuli of the disintegrating mother cytoskeleton (Figure 3C, -Shld1/+ATc,  
178 bottom row), strongly suggesting that the maternal CEN2 in these structures was not  
179 reused to build the corresponding structures in the daughters.

180

181 Although the localization of the CEN2 annuli coincides with the posterior edge of  
182 the ISP1 “cap” (Figure 1E and F), depletion of CEN2 from the peripheral annuli did not  
183 affect the localization of ISP1 even after 120 h of ATc treatment (Figure S1A, -  
184 Shld1/+ATc). Together with a previous finding that the loss of ISP1 has no impact on  
185 CEN2 localization (Beck et al., 2010), these data suggest that the assembly and  
186 maintenance of the CEN2- and ISP1- containing compartments are independent  
187 processes. We then examined the ATc-treated cKD parasites by electron microscopy, to  
188 investigate if the depletion of CEN2 from the preconoidal rings and peripheral annuli  
189 affected the ultrastructure of the cytoskeletal apical complex. The *CEN2* knockdown  
190 parasites (cKD, -Shld1/+ATc) were capable of extruding the conoid (Figure 3D). The  
191 structure of the preconoidal rings in the extruded conoid of these parasites also appeared  
192 to be normal. However, in slightly under one third of the parasites imaged (4 out of 14),  
193 the intra-conoid microtubules were not detectable (Figure 3D, bottom row). This is  
194 worth noting because the intra-conoid microtubules were always clearly visible in both  
195 wild-type parasites and cKD (+Shld1/-ATc) parasites prepared under the same  
196 conditions.

197

198 *CEN2 is critical for the parasite lytic cycle*

199 *Toxoplasma* is an obligate intracellular parasite. Its dissemination in the host relies on its  
200 ability to progress through multiple rounds of the lytic cycle, which consists of host cell  
201 invasion, parasite replication, and egress. To determine the impact of the loss of CEN2  
202 on the *Toxoplasma* lytic cycle, we examined the efficiency of the parasite in forming  
203 plaques when *CEN2* is knocked down in cKD parasites using a range of ATc  
204 concentrations, with different pre-treatment conditions for two days prior to the plaque  
205 assay (+Shld1/-ATc, -Shld1/-ATc, or -Shld1/+ATc) (Figure 4). For all pre-treatment  
206 conditions, the cKD parasites did not form plaques when subsequently cultured in the  
207 absence of Shld1 with an ATc concentration of 68 nM or higher, while the parental strain  
208 (KI:cKD) had comparable plaquing efficiencies under all ATc concentrations tested (0 to  
209 1080 nM). No plaques were observed when the cKD parasites were pre-treated with 270  
210 nM ATc for two days, even when there was no ATc added to the culture medium used in  
211 the plaque assay. This suggested CEN2 played an important role in the ability of the  
212 parasite to progress through multiple rounds of the lytic cycle.

213

214 *Parasites deficient in CEN2 are significantly impaired in invasion but not egress*

215 The lytic cycle consists of invasion, replication, and egress. To determine how CEN2  
216 might contribute to the steps of the lytic cycle, we first examined the ability of *CEN2*  
217 knockdown parasites to invade host cells, using an established two-color,  
218 immunofluorescence-based invasion assay. In this assay, the extracellular (non-invaded)  
219 and invaded parasites are differentially labeled due to a difference in antibody  
220 accessibility (Carey et al., 2004; Mital and Ward, 2008). Extracellular parasites have the  
221 outer surface of their plasma membrane fully exposed, and therefore can be directly



222 labeled by an antibody against a surface antigen (SAG1). On the other hand, parasites  
223 that have invaded a host cell can only be labeled after permeabilization of the host cell.  
224 We discovered that after ~16 h of -Shld1/+ATc treatment (a timepoint when CEN2 was  
225 nearly completely depleted from the pre-conoidal rings and peripheral annuli, and partially  
226 reduced in the centrioles and basal complex), the invasion efficiency of the cKD parasites  
227 was ~30% relative to the wild type ( $P = 0.009$ , Figure 5A&B and Table 1A). Upon ~48 h  
228 of -Shld1/+ATc treatment, invasion by the cKD parasites decreased to ~10% that of the  
229 wild-type parasite ( $P = 0.0014$ ) and ~19% that of the cKD +Shld1/-ATc control ( $P =$   
230  $0.005$ ) (Figure 5C&D and Table 1B).

231  
232 Comparison among the wild-type, parental (KI:cKD), and cKD parasites under  
233 various Shld1 and ATc treatment conditions further supports that parasite invasion  
234 efficiency is linked to the level of CEN2 expression (Figure 5C&D and Table 1B).  
235 Expressing FP-tagged CEN2 from both the endogenous locus as well as the ectopic  
236 TetO7Sag4 promoters, the parental line (KI:cKD, -Shld1/-ATc) invades at ~125% of the  
237 level of the wild-type parasite ( $P = 0.1208$ ). Derived from the KI:cKD line by deletion of  
238 the *eGFP-CEN2* gene from the endogenous locus, the cKD line invades at a significantly  
239 lower efficiency than KI:cKD. Consistent with the differences in the mAppleFP-CEN2  
240 levels (Figure 3B), the cKD parasites invade with different efficiencies under the  
241 +Shld1/-ATc (~56% of the wild-type,  $P = 0.033$ ), -Shld1/-ATc (~28%,  $P = 0.0071$ ), and -  
242 Shld1/+ATc (~10%,  $P = 0.0014$ ) conditions. The lower level of invasion for the cKD  
243 +Shield/-ATc parasites compared to the wild type is most likely because expression of  
244 ddfFKBP-mAppleFP-CEN2 in the cKD parasites is driven by the TetO7Sag4 promoter,  
245 which is known to be weak. Similar differences among the wild-type, parental (KI:cKD)  
246 and cKD parasites in TATi based systems have been observed before (Huynh and  
247 Carruthers, 2006).

248  
249 In contrast to the significant defect in invasion, CEN2 depletion did not result in a  
250 delay in calcium-induced egress. Upon stimulation with the calcium ionophore A23187,  
251 CEN2 knockdown parasites (cKD, -Shld1/+ATc, ~48 h) in more than 90% of vacuoles  
252 activated motility to egress within 6 min, similar to what was observed for the parental  
253 line (KI:cKD) (Figure 5E).

254  
255 *Parasites deficient in CEN2 are significantly impaired in micronemal secretion and form*  
256 *significantly fewer evacuoles and moving junctions*

257 Parasite invasion requires the secretion of adhesins from the micronemes, which allows  
258 the parasite to attach to and move into the host cell (Carruthers et al., 1999; Carruthers  
259 and Sibley, 1997; Huynh and Carruthers, 2006; Huynh et al., 2003). The adhesins, such  
260 as the micronemal protein MIC2, are secreted onto the parasite surface and then cleaved,  
261 releasing the ectodomain into the supernatant (Huynh and Carruthers, 2006; Huynh et al.,  
262 2003). A deficiency in secretion of these adhesins results in severely impaired host cell  
263 invasion. Upon examining the amount of released ectodomain in the supernatant by  
264 western blotting, we discovered that after ~40 h of CEN2 knockdown, ethanol stimulated  
265 MIC2 secretion was partially inhibited. This was reflected in the reduced amount of  
266 MIC2 in the secreted fraction and a corresponding increase in the pellet fraction (Figure  
267 5F&G). The secretion of two other micronemal proteins, PLP1 and MIC3, was also

268 significantly reduced, indicating that the impact of CEN2 depletion on micronemal  
269 secretion is global, and not limited to a specific micronemal protein. In contrast, the  
270 secretion of a dense granule protein, GRA8, was not affected by CEN2 depletion (Figure  
271 5F&G).

272  
273 During parasite invasion, micronemal secretion is followed by protein discharge  
274 from the rhoptries, another set of apically located organelles. Rhoptry discharge is  
275 typically visualized and assessed by the evacuole assay (Hakansson et al., 2001), in  
276 which the parasites are prevented from completing host cell invasion by treatment with  
277 cytochalasin D. The *CEN2* knockdown parasites (cKD, -Shld1/+ATc, ~48 h) generated  
278 significantly fewer evacuoles compared with the parental line (Figure 5H), consistent  
279 with the invasion defect. Secretion from the micronemes and rhoptries also both  
280 contribute to the formation of the moving junction, a structure critical for parasite  
281 invasion (Alexander et al., 2005; Beck et al., 2014; Lamarque et al., 2011; Mital et al.,  
282 2005; Tonkin et al., 2011). This ring-shaped constriction forms during parasite invasion  
283 to line the opening of the nascent parasitophorous vacuole (Figure 5I). As the parasite  
284 moves forward during invasion, it squeezes through this constriction, and eventually the  
285 moving junction caps the basal end of the parasite when invasion is complete. While the  
286 moving junction (labeled by anti-RON4) was readily observable for wild-type or cKD  
287 +Shld1/-ATc parasites in pulse invasion assays (Figure 5I), we were never able to see a  
288 single case of moving junction formation when CEN2 was knocked down (cKD, -  
289 Shld1/+ATc, 48 h).

290  
291 Despite the defect in secretion, CEN2 depletion does not appear to perturb the  
292 localization of the secretory organelles in intracellular parasites. Similar to the wild-type  
293 parasite, the micronemal vesicles (marked by anti-MIC2 antibody) were concentrated in  
294 the apical portion of the parasite when CEN2 was depleted (Figure 5J), indicating that the  
295 *CEN2*-containing structures play a role in the mechanics of micronemal secretion rather  
296 than the biogenesis or distribution of micronemal organelles. CEN2 depletion also did  
297 not affect the distribution of the rhoptries (labeled by anti-ROP2,3,4 and anti-RON2-4  
298 antibodies) and dense granules (labeled by anti-GRA8 antibody) (Figure S1B-G).

299  
300 *CEN2 knockdown results in abnormal replication patterns*  
301 The centrosome (including the centrioles and the spindle pole) is a critical organelle for  
302 cell division, and the basal complex has been shown to be involved in parasite  
303 cytokinesis (Heaslip et al., 2010). We therefore examined the impact of CEN2 depletion  
304 on parasite replication (Figure 6). As the level of CEN2 decreased due to ATc treatment  
305 and Shld1 withdrawal, an increasing proportion of vacuoles contained parasites that  
306 deviated from the canonical one-to-two division process (Figure 6A). After ~24 h with  
307 ATc treatment (Figure 6B & 7A-B), only ~11% of the vacuoles had parasites displaying  
308 abnormal division or growth. At this point, CEN2 had been depleted from the  
309 preconoidal rings and peripheral annuli to an undetectable level (Figure 3). We thus  
310 propose that the CEN2 pools in the preconoidal rings and peripheral annuli do not play a  
311 major role in parasite replication. By ~84 h of ATc treatment, ~64% of the vacuoles  
312 contained parasites that showed signs of abnormal replication (Figure 6B). In addition to  
313 multiple (>2) daughters assembling in mother parasites (Figure 7C), the parasites were



314 often swollen in size and some had undergone nuclear division without cytokinesis, *i.e.*,  
315 had multiple nuclei but no daughters (Figure 7D). Although the kinetics of CEN2  
316 depletion from the centrioles and the basal complex are similar, these replication defects  
317 are most likely due to CEN2 depletion from the centrioles, because the presence and  
318 appearance of the basal complex marker IAP1 (Frenal et al., 2014) were not significantly  
319 affected (Figure S2A-B). In addition, while centriole duplication occurred in CEN2  
320 depleted parasites, segregation of the centrioles appeared to be perturbed (Figure 7C), as  
321 indicated by the unequal distribution of foci that contained high anti-CEN3 signal among  
322 the daughter parasites. In some of the daughter parasites, no centriole signal was  
323 observed (red arrowheads). In the vacuoles containing parasites with replication defects,  
324 there was considerable variation in the size and cell cycle stage of the parasites,  
325 indicating that CEN2 depletion does not affect a specific checkpoint and that the  
326 cumulative effect of knockdown is stochastic in nature. Interestingly, the partitioning and  
327 inheritance of membrane-bound organelles such as the apicoplast (Figure S2C-D), were  
328 not severely perturbed. Although the appearance of the apicoplast was more  
329 heterogeneous in misshapen *CEN2* knockdown parasites (Figure S2D) when compared to  
330 parasites expressing stabilized CEN2 (Figure S2C), almost all of these parasites inherited  
331 an apicoplast.

332  
333  
334

## 335 **DISCUSSION**

336 In this work, we explore the function of TgCentrin2 (*CEN2*), a protein that localizes to  
337 four different cytoskeletal structures in *Toxoplasma gondii*. Using a dual system that  
338 regulates transcription through ATc/TATi and protein stability through Shld1/ddFKBP,  
339 we determined the time course of CEN2 depletion by quantitative fluorescence imaging  
340 and used it as a guideline to dissect the functional consequences of CEN2 depletion from  
341 the individual structures. We found that CEN2 is depleted to an undetectable level from  
342 the pre-conoidal rings and peripheral annuli much earlier than from the centrioles and  
343 basal complex. The ordered depletion of CEN2 from the two sets of structures is  
344 correlated with the development of defects in two distinct steps of the parasite lytic cycle:  
345 invasion and replication. This indicates that CEN2 is recruited to multiple cytoskeletal  
346 structures and is required for distinct aspects of parasite physiology.

347

348 *The dual-regulation system enables tight control of genes critical for the parasite lytic*  
349 *cycle*

350 Numerous attempts to generate a knockout mutant of *CEN2* using Cre-LoxP and  
351 CRISPR-Cas9 based methods failed. Furthermore, a *CEN2* knockdown line in which  
352 *CEN2* downregulation solely relied on transcriptional control with ATc quickly became  
353 unresponsive to ATc treatment, probably as a result of selecting for mutants that had lost  
354 ATc sensitivity within the population. While essentiality cannot be positively proven  
355 (*i.e.* essential genes cannot be deleted, but unsuccessful attempts to generate knockout  
356 mutants do not prove essentiality), these results suggest that the parasite is highly  
357 sensitive to altered *CEN2* expression and that *CEN2* is likely to be essential. By  
358 implementing a dual-regulation system that simultaneously utilizes ATc/TATi to control  
359 transcription and Shld1/ddFKBP to control protein stability, the expression of *CEN2* can

360 be consistently downregulated. Although growth adaptation can still be detected over  
361 long-term passage (>3 months), the phenotype is sufficiently stable for analysis as long  
362 as care is taken to use low passage cultures. Given that a single conditional regulation  
363 technique (e.g. ATc-based transcriptional regulation or ddFKBP-based protein  
364 degradation) is always “leaky” to some extent, a knockdown strategy that employs  
365 orthogonal methods can be useful for characterizing the functions of genes that are  
366 otherwise difficult to manipulate.

367

368 *The kinetics of protein knockdown are affected by structural inheritance through cellular*  
369 *replication*

370 In addition to the half-life of transcripts and their protein products, the kinetics of protein  
371 knockdown are affected by structural inheritance through cellular replication. Given that  
372 *Toxoplasma* and other apicomplexans divide by building daughters inside the mother, if  
373 everything else is equal, components of the cortical cytoskeleton or an organelle  
374 regenerated *de novo* with every replication should be depleted much faster than those of  
375 structures inherited from the mother parasite. For proteins such as CEN2 that are  
376 components of multiple structures, this is an important consideration when delineating  
377 their functions. For instance, our data indicate that structural inheritance plays an  
378 important role in the differential depletion of CEN2 from the four structures: the CEN2  
379 populations in the preconoidal rings and peripheral annuli are depleted much earlier,  
380 because these structures are made *de novo* during parasite replication. In contrast, the  
381 CEN2 population in the centrioles persists over many generations after downregulation,  
382 because each daughter inherits one pair of the duplicated centrioles from the mother.  
383 However, factors other than structural inheritance must also contribute to the differential  
384 depletion of CEN2, as the CEN2 population in the basal complex does not fit this pattern.  
385 A new basal complex is built for each daughter with every generation (Hu, 2008; Hu et  
386 al., 2006), but the depletion of CEN2 from the basal complex follows a trend similar to  
387 that of the centrioles rather than the preconoidal rings or peripheral annuli. One possible  
388 explanation is that as complete CEN2 removal is lethal, only parasites that still express a  
389 small amount of CEN2 protein can survive under -Shld1/+ATc conditions. The residual  
390 CEN2 protein in these parasites is then preferentially incorporated into the basal complex  
391 and centrioles instead of the preconoidal rings and peripheral annuli, perhaps due to  
392 differences in binding affinity.

393

394

395 *The role of CEN2 in regulating parasite invasion*

396 The downregulation of CEN2 results in pronounced defects in both parasite invasion and  
397 replication. The invasion defect emerged at an early stage of *CEN2* knockdown (~16 h of  
398 ATc treatment and Shld1 withdrawal) when CEN2 had disappeared from the preconoidal  
399 rings and peripheral annuli and been partially depleted from the centrioles and the basal  
400 complex. The timing of depletion suggests that the preconoidal rings and peripheral  
401 annuli likely play an important role in parasite invasion. However, the other pools of  
402 CEN2 in the centrioles, basal complex, and cytoplasm might also be involved in invasion.  
403 In support of this hypothesis, we found that the invasion efficiency of cKD parasites  
404 decreased from 30% to 10% upon further CEN2 depletion (~16 h vs 48 h of ATc  
405 treatment and Shld1 withdrawal) after it had already disappeared from the preconoidal

406 rings and peripheral annuli but was still in the process of being depleted from the  
407 centrioles and basal complex. However, it is also possible that further depletion of a very  
408 small amount of CEN2 remaining at the apical structures (not detectable by mAppleFP  
409 fluorescence) was responsible for the further decrease in invasion efficiency from 16 h to  
410 48 h of CEN2 downregulation.

411

412 Part of the invasion defect upon *CEN2* knockdown can be explained by the  
413 impaired secretion of MIC2, a major adhesin that mediates parasite attachment to the host  
414 cell. As CEN2 is an EF-hand containing protein, it will be of interest to determine  
415 whether CEN2 is part of the calcium signaling pathway that controls parasite secretion  
416 and invasion. One potential link is *Toxoplasma* phosphoinositide phospholipase C (TgPI-  
417 PLC), which is also concentrated in the apical end of the parasite (Fang et al., 2006;  
418 Hortua Triana et al., 2018) and has been hypothesized to impact micronemal secretion  
419 through regulating calcium homeostasis and the production of phosphatidic acid (Bullen  
420 et al., 2016). It is also tempting to speculate that some of the CEN2-containing structures  
421 (e.g. the preconoidal rings and peripheral annuli) might be calcium-sensitive contractile  
422 structures that gate the release of micronemal contents, but we have not been able to  
423 detect specific enrichment of MIC2 at these locations before or after CEN2 depletion. In  
424 a subset (~29%) of the *CEN2* knockdown parasites, the intra-conoid microtubules were  
425 not detectable. The intra-conoid microtubules have been proposed to serve as tracks for  
426 micronemal secretion. It is thus conceivable that structural perturbation of the intra-  
427 conoid microtubules interferes with micronemal secretion. However, the lack of intra-  
428 conoid microtubule detection in this subset of parasites could also be the result rather  
429 than the cause for perturbed micronemal secretion, since the lack of vesicle or protein  
430 association might result in decreased stain deposition along the intra-conoid microtubules  
431 in electron microscopy.

432

433 It is important to note that secretion of the three micronemal proteins tested  
434 (MIC2, MIC3, and PLP1) is not completely blocked by the depletion of CEN2, and the  
435 invasion defect of the *CEN2* knockdown is more severe than that of the knockout mutants  
436 for individual micronemal proteins (Cerede et al., 2005; Gras et al., 2017; Kafsack et al.,  
437 2009). Furthermore, the cKD parasites cultured in +Shld1/-ATc had lower invasion  
438 efficiency compared to the parental line (KI:cKD), but secreted MIC2 at a similar level.  
439 Therefore, CEN2 downregulation must affect other processes that also contribute to  
440 invasion. One such process might be moving junction formation, which requires protein  
441 secretion from both the micronemes and the rhoptries (Alexander et al., 2005; Beck et al.,  
442 2014; Lamarque et al., 2011; Mital et al., 2005; Tonkin et al., 2011). Indeed, we found  
443 that *CEN2* knockdown parasites generated significantly fewer evacuoles and moving  
444 junctions compared with the wild-type and cKD +Shld1/-ATc parasites. Furthermore,  
445 similar to the *CEN2* knockdown parasite, mutants of moving junction components also  
446 have low invasion efficiency, but no obvious egress defect (Beck et al., 2014; Mital et al.,  
447 2005). It is therefore possible that CEN2 controls parasite invasion partially by  
448 regulating moving junction formation. While this is an appealing hypothesis, we should  
449 point out that rhoptry secretion occurs after the parasites make contact and form an  
450 intimate attachment with the host cell. Therefore, the apparent deficiency in rhoptry  
451 discharge and moving junction formation might instead be a consequence of upstream

452 invasion processes disrupted by *CEN2* knockdown rather than the direct cause of the  
453 invasion defect.

454

455

456 *The role of CEN2 in regulating parasite replication*

457 *CEN2* is a component of the centrioles and the depletion of *CEN2* from the centrioles  
458 correlates with an increase in abnormal parasite replication. The centrosome (including  
459 the centrioles and the spindle pole) has been hypothesized to orchestrate daughter  
460 construction and organelle biogenesis in *Toxoplasma* (Dhara et al., 2017; Francia et al.,  
461 2012; Hu et al., 2002; Nishi et al., 2008; Suvorova et al., 2015). For instance,  
462 knockdown of the centrosome-associated SFAs impairs the initiation of construction of  
463 the daughter cytoskeleton (Francia et al., 2012). When a temperature sensitive mutant of  
464 MAPKL was inactivated at the non-permissive temperature, the parasite generated an  
465 abnormally high number of daughters without completion of cytokinesis (Suvorova et al.,  
466 2015). Significant depletion of *CEN2* from the centrioles results in a heterogeneous  
467 population of multi-nucleated (without daughters), multi-daughter (>2), as well as normal  
468 looking parasites. This suggests that *CEN2* does not control a specific "checkpoint" or  
469 coupling point of the regulatory circuit of the cell cycle. However, it is worth noting that  
470 in the parasites that survive prolonged (~120 h) ATc treatment, the *CEN2* signal in the  
471 centrioles remains detectable, likely because complete *CEN2* removal is lethal.  
472 Therefore, the consequence of total loss of *CEN2* for parasite replication remains  
473 unknown. It would also be of interest to determine the functions of other centrins  
474 homologs (*CEN1* and 3) in the centrioles, and whether they have roles in replication that  
475 overlap with *CEN2*.

476

477 The *CEN2* containing structures are critical for parasite invasion, replication and  
478 survival. Future identification and characterization of structure-specific proteins will  
479 facilitate more precise function designation, and aid in the discovery of promising  
480 "druggable" targets that lead to multiple points of vulnerability in the parasite.

481

482

483

## 484 **MATERIALS AND METHODS**

485

486 *T. gondii*, host cell cultures, and parasite transfection

487 Tachyzoite *T. gondii* parasites were maintained by serial passage in confluent human  
488 foreskin fibroblast (HFFs, ATCC# SCRC-1041) monolayers in Dulbecco's Modified  
489 Eagle's Medium (DMEM, Life Technologies-Gibco, Cat# 10569-010), supplemented  
490 with 1% (v/v) heat-inactivated cosmic calf serum (Hyclone, Cat# SH30087) as previously  
491 described (Leung et al., 2017; Liu et al., 2016; Roos et al., 1994). African green monkey  
492 renal epithelial cells (BS-C-1, ATCC# CCL-26) used for the invasion assays and rat  
493 aortic smooth muscle cells (A7r5, ATCC# CRL-1444) used for live imaging and  
494 immunofluorescence assays were cultured in the same manner as HFFs. The *ddFKBP-*  
495 *mAppleFP-CEN2* cKD ("cKD") parasites were cultured in the presence of 125 nM  
496 Shield-1 (a kind gift from Dr. Tom Wandless, Stanford University, Stanford)  
497 (Banaszynski et al., 2006) to stabilize its *ddFKBP-mAppleFP-CEN2*. Downregulation of  
498 *ddFKBP-mAppleFP-CEN2* was achieved by removal of Shld1 and incubation in medium

499 supplemented with 270 nM anhydrotetracycline (ATc) (Clontech) unless noted otherwise.  
500 *T. gondii* transfections were carried out as previously described (Liu et al., 2013).

501

502

503 *Alignment analysis of selected centrin homologs*

504 Protein sequences for selected centrin homologs were aligned using the MUSCLE  
505 program accessed through JalView (v2.8.1, <http://www.jalview.org>) with default  
506 parameters and displayed using the Clustal X color scheme.

507

508

509 *Cloning of plasmids*

510 Primers used in cloning DNA fragments and for sequencing are listed in Table S1.  
511 Genomic DNA (gDNA) fragments were amplified using gDNA template prepared from  
512 RH, RH $\Delta$ *hx* or RH $\Delta$ *ku80* $\Delta$ *hx* (“RH $\Delta$ *ku80*”) parasites (a kind gift from Dr. Vern  
513 Carruthers, University of Michigan, Ann Arbor, MI) (Fox et al., 2009; Huynh and  
514 Carruthers, 2009) using the Wizard Genomic DNA Purification Kit (Cat# A1120,  
515 Promega, Madison, WI) according to the manufacturer’s instructions. Similarly, coding  
516 sequences (CDS) were amplified using *T. gondii* complementary DNA (cDNA). All  
517 DNA fragments generated by PCR were confirmed by sequencing.

518

519 pTKO2\_II-eGFP-CEN2 (for generation of *eGFP-CEN2* knock-in parasites):

520 This plasmid was constructed in the pTKO2\_II plasmid backbone (Heaslip et al., 2010)  
521 designed for replacement of genes in *T. gondii* by homologous recombination. Three  
522 fragments were generated and ligated with the pTKO2\_II vector backbone using the  
523 corresponding sites. The 3’UTR of *CEN2* (TgGT1\_250340) was amplified using S1 and  
524 AS1 as primers and RH gDNA as the PCR template, and ligated via the *NheI* and *ApaI*  
525 sites. The 5’UTR was amplified using S2 and AS2 as primers and RH gDNA as the PCR  
526 template, and ligated via the *NotI* and *EcoRI* sites. The *eGFP-CEN2* CDS with a Kozak  
527 sequence and flanking *PmeI* and *RsrII* sites was synthesized (GenScript Inc, NJ) and  
528 ligated via the *PmeI* and *RsrII* sites.

529

530 pmin-mCherryFP-CEN2 (intermediate plasmid for cloning pTATi1-TetO7Sag4-  
531 ddfFKBP-mAppleFP-CEN2, below): This plasmid was constructed by Biomeans Inc  
532 (Sugar Land, TX). Briefly, the *CEN2* CDS was amplified using primers S3 and AS3 and  
533 cloned into pCR-Blunt-II-TOPO (Invitrogen), prior to ligation with the plasmid backbone  
534 of pmin-mCherryFP-TgICMAP1 via the *BamHI* and *AflIII* sites. [pmin-mCherryFP-  
535 TgICMAP1 has the same vector backbone as pmin-eGFP-TgICMAP1 (Heaslip et al.,  
536 2009) but with mCherryFP in place of eGFP.]

537

538 pTATi1-TetO7Sag4-ddFKBP-mAppleFP-CEN2 (for generation of *eGFP-TgCEN2*  
539 knock-in:cKD and cKD parasites):

540 To generate pTATi1-TetO7Sag4-ddFKBP-mAppleFP-CEN2, two synthesized DNA or  
541 plasmid digestion fragments were generated and ligated with the pTATi1-TetO7Sag4  
542 vector backbone using the corresponding sites. The ddfFKBP-mAppleFP fragment  
543 features a *MfeI* restriction site in between the ddfFKBP and mAppleFP coding sequences,  
544 and was synthesized (GenScript Inc, NJ) and ligated via flanking *NheI-BamHI* sites to the



545 *NheI*-*Bgl*III sites on the vector backbone. The *CEN2* fragment was derived from the  
546 pmin-mCherryFP-CEN2 plasmid and ligated via the flanking *Bam*HI-*Afl*III sites to the  
547 *Bgl*III-*Afl*III sites on the vector backbone. The pTATi1-TetO7Sag4 vector backbone was  
548 constructed from a four-component HiFi assembly (Cat# E5520, New England Biolabs):  
549 1) the vector backbone, which contains the bacterial origin of replication, beta-lactamase  
550 gene for ampicillin resistance, Cre recombinase CDS, and DHFR 3'UTR, was generated  
551 from an *Apa*I and *Bmt*I double restriction digest of the plasmid ptub1200bp-mAppleFP-  
552 Cre (see below); 2) the TATi1 CDS expression cassette was amplified by PCR using  
553 primers S4 and AS4 with the plasmid ptub8-TATi1-HX (a kind gift from Dr. Dominique  
554 Soldati-Favre, University of Geneva, Geneva, Switzerland) (Meissner et al., 2002) as the  
555 template; 3) the sagCATsag chloramphenicol transferase expression cassette was released  
556 from the plasmid ptub1200bp-mAppleFP-Cre by digestion with *Ppu*MI and *Hind*III; 4)  
557 the ATc-responsive TetO7Sag4 mini-promoter was amplified by PCR using primers S5  
558 and AS5 with the plasmid TetO7Sag4\_mycGFP (a kind gift from Dr. Dominique Soldati-  
559 Favre, University of Geneva, Geneva, Switzerland) (Meissner et al., 2002) as the  
560 template. The ptub1200bp-mAppleFP-Cre plasmid intermediate was constructed by  
561 ligating via the *Ppu*MI and *Nhe*I sites a truncated tubulin promoter amplified by PCR  
562 using primers S6 and AS6 with the plasmid ptub-mAppleFP-TLAP2 (Liu et al., 2016) as  
563 the template, and ligating via the *Bgl*III and *Afl*III sites the plasmid backbone ptub-  
564 mAppleFP-TLAP2 with the Cre recombinase CDS, which was amplified by PCR using  
565 primers S7 and AS7 with the plasmid ptub-Cre-EGFP (Heaslip et al., 2010) as the  
566 template.

567  
568 pTKO2\_II\_mCherryFP-Cre-EGFP (for excision of the *LoxP*-flanked *eGFP-TgCEN2*  
569 knock-in expression cassette): This plasmid was constructed by ligating the Cre-EGFP  
570 expression cassette from pmin-Cre-EGFP (Heaslip et al., 2010) with the plasmid  
571 backbone of pTKO2\_II\_mCherryFP (Liu et al., 2013) via the *Not*I and *Apa*I sites.

572  
573

#### 574 *Generation of knock-in, conditional knockdown, and transgenic parasites*

575 *eGFP-CEN2* knock-in parasites:

576 Approximately  $1 \times 10^7$  RH*Ahx* parasites were electroporated with 50  $\mu$ g of pTKO2\_II-  
577 eGFP-CEN2 linearized with *Not*I and selected with 25  $\mu$ g/mL mycophenolic acid and 50  
578  $\mu$ g/mL xanthine for four passages, and enriched by FACS for parasites with an  
579 intermediate level of eGFP signal to reduce the number of parasites in the population that  
580 had not undergone double homologous recombination. Clones were screened by  
581 fluorescence light microscopy, and confirmed by diagnostic gDNA PCRs to have the  
582 *CEN2* endogenous locus replaced by a *LoxP*-flanked eGFP-CEN2 expression cassette.  
583 One clone was further verified by Southern blotting; this clone was used for the  
584 subsequent generation of *eGFP-TgCEN2* knock-in:cKD and cKD parasites.

585

586 *eGFP-TgCEN2* knock-in:cKD (KI:cKD) parasites:

587 The *eGFP-CEN2* knock-in parasites were transfected with 30  $\mu$ g of pTATi1-TetO7Sag4-  
588 ddfKBP-mAppleFP-CEN2 that subsequently integrated multiple times, randomly into  
589 the parasite genome after selection with 20  $\mu$ M chloramphenicol.

590

591 *ddFKBP-mAppleFP-CEN2* cKD (cKD) parasites:  
592 KI:cKD parasites ( $\sim 1 \times 10^7$ ) were electroporated with 20  $\mu\text{g}$  of pTKO2-mCherryFP-Cre-  
593 eGFP to excise the knock-in expression cassette between the two *LoxP* sites, selected  
594 with 80  $\mu\text{g}/\text{mL}$  of 6-thioxanthine for two passages, and screened for the loss of eGFP-  
595 CEN2 fluorescence. Clones were confirmed by diagnostic gDNA PCRs. One clone  
596 (clone 10) was further verified by Southern blotting and used in all of the experiments  
597 reported here. In the resultant parasite line (cKD), the expression level of *ddFKBP-*  
598 *mAppleFP-CEN2* is controlled by ATc and Shld1. The parasite line was maintained in  
599 the presence of 125 nM Shld1 unless indicated otherwise.

600

601

602 *Generation of the rat TgCEN3 and TgIAP1 antibodies*

603 Purified recombinant TgCEN3 (TogoA.00877.a.A1.PS00788) and TgIAP1  
604 (TogoA.17172.a.A1.PW29285) proteins (kind gifts from the Seattle Structural Genomics  
605 Center for Infectious Disease, Seattle, WA) were used to inject rats for antibody  
606 production (Cocalico Biologicals, Inc) and sera of the immunized animals were harvested  
607 for performing the immunofluorescence labeling of TgCEN3 and TgIAP1.

608

609

610 *FACS and parasite cloning*

611 Fluorescence activated cell sorting was performed using an AriaII flow cytometer (BD  
612 Biosciences, San Jose, CA) driven by FACSDiva software at the Indiana University  
613 Bloomington Flow Cytometry Core Facility (Bloomington, IN). To subclone parasites  
614 by limiting dilution, 3-25 parasites (depending on the survival rate of specific parasite  
615 lines after sorting) with the desired fluorescence profile were sorted per well of a 96-well  
616 plate containing confluent HFF monolayers. Wells were screened 7-9 days after sorting  
617 for single plaques.

618

619

620 *Southern blotting*

621 Southern blotting was performed as previously described (Liu et al., 2016; Liu et al.,  
622 2013) with probes synthesized using components based on the NEBlot Phototope Kit  
623 (New England BioLabs, Cat# N7550) and detected using components based on the  
624 Phototope-Star detection kit (New England BioLabs, Cat# N7020). All *T. gondii* gDNA  
625 was prepared from freshly egressed parasites and extracted using the Wizard Genomic  
626 DNA Purification kit (Cat# A1120, Promega, Madison, WI).

627

628 To probe and detect changes at the *CEN2* genomic locus in the *RH $\Delta$ hx* (WT),  
629 *eGFP-CEN2* knock-in (KI), KI:cKD, and cKD parasites, 5  $\mu\text{g}$  of gDNA was digested  
630 with *ScaI*. A CDS probe (282 bp) specific for Exon 1 of *CEN2* was amplified from *T.*  
631 *gondii* *RH $\Delta$ hx* gDNA using primers S8 and AS8, and used as a template in probe  
632 synthesis. A probe specific for the region upstream of the *CEN2* genomic locus (168 bp)  
633 was amplified from plasmid pTKO2\_II-eGFP-CEN2 using primers S9 and AS9 and used  
634 as a template in probe synthesis.

635

636

637

638 *Plaque assay*

639 Plaque assays were performed as previously described with some modifications (Liu et  
640 al., 2016). A total of 100, 200 or 500 freshly egressed, pre-treated parasites (see below)  
641 was added to each well of a 12-well plate containing a confluent HFF monolayer, and  
642 incubated undisturbed for 6-7 days. The pre-treatment medium and corresponding  
643 incubation medium were either the regular parasite growth medium, or the medium  
644 supplemented with the concentrations of either ATc or Shld1 as indicated in the text and  
645 figure legends. Infected monolayers were then fixed with 3.7% (v/v) formaldehyde at  
646 25°C for 10 min, washed with Dulbecco's phosphate-buffered saline (DPBS), stained  
647 with 2% (w/v) crystal violet, 20% (v/v) methanol in DPBS for 15 min, gently rinsed with  
648 distilled water and air dried.

649  
650

651 *Wide-field deconvolution microscopy*

652 Image stacks were acquired at 37°C using a DeltaVision imaging station (GE Healthcare  
653 / Applied Precision) fitted onto an Olympus IX-70 inverted microscope base. A 60X  
654 silicone oil immersion lens (Olympus 60X U-Apo N, NA 1.3) used with or without an  
655 auxiliary magnification of 1.5X, or 100X oil immersion lens (Olympus 100X UPLS Apo,  
656 NA = 1.40) with immersion oil at a refractive index of 1.524 was used for imaging. 3D  
657 image stacks were collected with a z-spacing of 0.3 µm unless otherwise noted. Images  
658 were deconvolved using the point spread functions and software supplied by the  
659 manufacturer. All samples for wide-field deconvolution and for 3D-SIM (below) were  
660 prepared in 35-mm dishes (#1.5) with a 20- or 14-mm microwell (P35G-1.5-20-C or  
661 P35G-1.5-14-C; MatTek) in phenol red-free, CO<sub>2</sub>-independent medium for live imaging  
662 and in DPBS with 10 mM sodium azide for fixed samples. Contrast levels were adjusted  
663 to optimize the display.

664  
665

666 *Three-dimensional structured-illumination microscopy (3D-SIM)*

668 3D-SIM image stacks were acquired using an OMX imaging station (GE Healthcare /  
669 Applied Precision, Seattle, WA). A 100X oil immersion lens (NA = 1.40) with  
670 immersion oil at a refractive index of 1.516 or 1.518 was used; stacks were collected with  
671 a z-spacing of 0.125 µm. Images were deconvolved using the point spread functions and  
672 software supplied by the manufacturer.

673  
674

675 *Electron microscopy*

677 Negative staining of whole mount, detergent-extracted parasites was performed as  
678 described in (Leung et al., 2017). To determine the effect of CEN2 depletion on the  
679 parasite cytoskeleton, cKD parasites were treated with -Shld1/+ATc for 144 h prior to  
680 processing for EM analysis.

681  
682  
683  
684  
685

686 *Quantification of mAppleFP-CEN2 fluorescence in cKD parasites*

687

688 *a. Parasite culture and imaging conditions*

689 *T. gondii* cultures were grown in culture medium +Shld1/-ATc (125 nM Shld1), -Shld1/  
690 ATc, or -Shld1/+ATc (270 nM ATc) for 12, 24, 48, 72, 96 or 120 h prior to live imaging.  
691 The average intensity of individual CEN2-containing structures in cKD parasites cultured  
692 in +Shld1/-ATc was used to calculate the baseline fluorescence. Multiple flasks of  
693 parasites were coordinated with staggered timing such that a freshly lysed flask was used  
694 to inoculate 35-mm dishes (#1.5) with a 20-mm microwell (P35G-1.5-20-C; MatTek)  
695 approximately 16 h prior to imaging. This yielded smaller vacuoles containing 2, 4 or 8  
696 parasites to facilitate imaging each of the four CEN2-containing compartments within the  
697 parasite for the quantification of mAppleFP-TgCEN2 signal. The medium in each dish  
698 was replaced with pre-warmed, phenol red-free CO<sub>2</sub>-independent medium (custom order,  
699 SKU#RR060058; Gibco/Life Technologies) prior to imaging. Dishes were imaged in a  
700 humidified environmental chamber maintained at 37°C.

701

702 Twenty full fields of view (1024 x 1024 pixels) were collected with 2x2 binning  
703 for quantitative analysis. For each field of view, a reference differential interference  
704 contrast (DIC) image was acquired followed by a 3D stack of three z-slices, spaced 1.0  
705 μm apart, of fluorescence images in the mAppleFP and eGFP channels. Irradiation of  
706 each field of view was minimized to prevent photobleaching and kept consistent to  
707 reduce variability in the quantification.

708

709 *b. Image analysis*

710 Image analysis strategies and procedures used here were carried out as previously  
711 described in (Murray, 2017). The Semper software package [source code kindly  
712 provided by Dr. Owen Saxton (Murray-Edwards College, University of Cambridge,  
713 United Kingdom) (Saxton et al., 1979)] was used for image analysis.

714

715 *c. Grouping of integrated fluorescence and statistical analysis*

716 A minimum of twenty vacuoles were quantified per parasite line and drug treatment.  
717 Vacuoles containing a smaller number of intracellular parasites (2, 4 or 8 parasites) were  
718 used for quantification, and the mAppleFP-CEN2 signal was classified into four groups  
719 corresponding to each of the compartments it localizes to in the parasite (preconoidal  
720 rings, peripheral annuli, centrioles, and basal complex). All photons/s measurements  
721 shown are per individual structure, per parasite except for the peripheral annuli, which  
722 were quantified collectively (*i.e.*, all annuli in one parasite were grouped as a single  
723 value). Since the basal complexes of parasites tend to cluster within a vacuole, these  
724 were quantified collectively for each vacuole and subsequently calculated per parasite,  
725 based on the number of parasites observed in the corresponding reference DIC image.  
726 Data were analyzed using two-way ANOVA and Dunnett's multiple comparisons tests  
727 with GraphPad Prism v7 (La Jolla, CA).

728

729

730 *Immunofluorescence assay for intracellular parasites*

731 *T. gondii*-infected HFF monolayers growing in a 3.5 cm glass-bottom dish were fixed  
732 with 3.7% (v/v) formaldehyde in DPBS for 10 min, permeabilized with 0.5% (v/v) Triton  
733 X-100 (TX-100) in DPBS for 15 min, and blocked in 1% (w/v) BSA in DPBS for 30-60

734 min, followed by antibody labeling (see below). Dishes were incubated with primary  
735 antibodies for 30-60 min followed by incubation with secondary antibodies for 30-60 min  
736 unless otherwise noted. Primary antibodies and dilutions used were as follows: rabbit  
737 anti-ACP, 1:500 (a kind gift from Dr. David Roos, University of Pennsylvania,  
738 Philadelphia, PA and Dr. Geoff McFadden, University of Melbourne, Melbourne,  
739 Australia) (Waller et al., 1998); rabbit anti-TgIMC1, 1:1,000 (a kind gift from Dr. Con  
740 Beckers, University of North Carolina, Chapel Hill) (Mann and Beckers, 2001); mouse  
741 anti-TgISP1, 1:1,000 (a kind gift from Dr. Peter Bradley, University of California, Los  
742 Angeles) (Beck et al., 2010); mouse anti-TgMIC2 6D10, 1:1,000 (a kind gift from Dr.  
743 Vern Carruthers, University of Michigan, Ann Arbor) (Carruthers et al., 2000); mouse  
744 monoclonal anti-GRA8 and mouse monoclonal anti-IMC1 45.36 antibodies, 1:1,000  
745 (kind gifts from Dr. Gary Ward, University of Vermont, Burlington) (Carey et al., 2000;  
746 Ward and Carey, 1999); mouse anti-ROP2,3,4, 1:1,000 (a kind gift from Dr. Jean-  
747 François Dubremetz, Université de Montpellier, Montpellier, France) (Leriche and  
748 Dubremetz, 1991); rabbit anti-RON2-4 and rabbit anti-RON4, 1:500 (kind gifts from Dr.  
749 Maryse Lebrun, Université de Montpellier, Montpellier, France) (Lamarque et al., 2011;  
750 Lebrun et al., 2005); rat anti-CEN3, 1:1,000 (this study); and rat anti-IAP1, 1:1,000 (this  
751 study). Secondary antibodies, all used at 1:1,000 dilution were: goat anti-rabbit IgG  
752 Alexa488, 1:1,000 (Cat#A11034, Molecular Probes); goat anti-rabbit IgG Alexa568  
753 (Cat#A11036, Molecular Probes); goat anti-rat IgG Alexa488 (Cat#A11006, Molecular  
754 Probes); goat anti-rat IgG Alexa568 (Cat#A11077, Molecular Probes); goat anti-mouse  
755 IgG Cy3 (Cat#115-166-003, Jackson ImmunoResearch); goat anti-mouse IgG Alexa488  
756 (Cat# A11029, Molecular Probes); and goat anti-mouse IgG Alexa568 (Cat# A11031,  
757 Molecular Probes). To label the nucleus, 4',6-diamidino-2-phenylindole (DAPI) was  
758 used at a final concentration of 1  $\mu\text{g}/\text{mL}$ . All immunofluorescence labeling steps were  
759 performed at room temperature.

760  
761

#### 762 *Invasion assays*

763 Invasion assays were performed as previously described (Leung et al., 2017) with the  
764 following modifications. Since we observed during routine culturing that there was a  
765 clear invasion defect for a subset of the parasite lines, preparation of the cultures was  
766 adjusted in terms of the amount of inoculum, and timed such that all parasite preparations  
767 would be at the same stage at the time of harvest. For ATc treatment (-Shld1/+ATc), at  
768 approximately 48, 40 or 16 h prior to harvest, the medium for the indicated subset of  
769 parasites was changed to that containing 270 nM ATc and no Shld1.

770  
771 For the first round of immunolabeling, the primary antibody was mouse anti-  
772 SAG1 (Argene, Cat# 11-132; 1:1,000 dilution for 30 min), followed by goat anti-mouse  
773 Alexa568 (1:1,000 dilution for 30 min). For the second round of immunolabeling, the  
774 primary antibody was rabbit anti-SAG1 (a kind gift from Dr. Lloyd Kasper, Dartmouth  
775 College, Lebanon, NH; 1:1,000 dilution for 30 min), followed by goat anti-rabbit IgG  
776 Alexa488 (1:1,000 dilution for 30 min). The dishes were imaged at low magnification  
777 (Olympus 20X UPlanApo, numerical aperture (NA) = 0.70) for a total of 15 full-fields of  
778 view per sample for each of three independent experiments. Fields were randomly  
779 selected using the Alexa488 channel. The mean number of parasites counted per sample,  
780 per replicate was ~3,926.



781

782

783

784

785

786

787

788

789

790

791

792

793

794

795

796

797

798

799

800

801

802

803

804

805

806

807

808

809

810

811

812

813

814

815

816

817

818

819

820

821

822

823

824

825

826

Semi-automated quantification of invaded parasites was performed using FIJI [ImageJ v. 2.0.0-rc-65/1.51s; (Schindelin et al., 2012; Schneider et al., 2012)] as previously described (Leung et al., 2017). Pairwise comparisons were made with unpaired, two-tailed Student's t-tests using GraphPad Prism, v7 (GraphPad, La Jolla, CA).

#### *Microneme secretion (excretory/secretory antigen assay)*

Microneme secretion assays were performed as previously described (Leung et al., 2017) with some modifications. Freshly egressed parasites were harvested and resuspended in DMEM supplemented with 1% (v/v) cosmic calf serum (Hyclone, Cat# SH30087.3). Excreted/secreted antigen preparation was performed by incubating  $1 \times 10^8$  parasites (adjusting the final volume to 500  $\mu$ L) at 37°C for 7-15 min in 2% (v/v) ethanol to assess induced secretion. Tubes were placed on ice for 5 min immediately afterwards, and centrifuged at 1,000 x g for 6 min at 4°C. 450  $\mu$ L of the supernatant was removed and centrifuged again, and 400  $\mu$ L of the second supernatant was concentrated ~tenfold using an Amicon Ultra 3,000 MWCO centrifugal filter device (Millipore) before adding an equal volume of 4X NuPAGE sample buffer. The pellet was washed with DPBS and resuspended in 50  $\mu$ L RIPA buffer (150 mM NaCl, 1% (v/v) NP-40, 0.5% (v/v) sodium deoxycholate, 0.1% (w/v) SDS, 50 mM Tris, pH 7.4), and then treated with benzonase nuclease (Santa Cruz Biotechnology, TX) for 15 min at 37°C before the addition of an equal volume of 4X NuPAGE sample buffer. Samples were incubated at 75°C for 10 min and resolved using NuPAGE 4-12% Bis-Tris gels, and blotted by wet transfer to nitrocellulose membrane. Membranes were processed for western blotting by probing with mouse mAb anti-TgMIC2 6D10, 1:5,000; mouse mAb anti-TgMIC3 T4 2F3, 1:200 (a kind gift from Dr. Maryse Lebrun, Université de Montpellier, Montpellier, France) (Cerede et al., 2005); rabbit anti-TgPLP1, 1:1,000 (a kind gift from Dr. Vern Carruthers, University of Michigan, Ann Arbor) (Kafsack et al., 2009); mouse anti-GRA8 (1:5,000), and rabbit anti-TgMLC1 (1:2,000; a kind gift from Dr. Con Beckers, University of North Carolina, Chapel Hill) (Gaskins et al., 2004) in TBS-T with 5% (w/v) BSA or blocking solution (1% (w/v) casein, Hammarsten, 0.1 M maleate pH 7.5, 0.1 M NaCl), washed with TBS-T, followed by goat anti-mouse IRDye 680RD, goat anti-mouse IRDye 800CW, or goat anti-rabbit IRDye 800CW infrared dye-conjugated antibodies (1:10,000; LI-COR) in TBS-T with 5% (w/v) nonfat dry milk or blocking solution. Blots were scanned in the 700- and 800-nm channels using an LI-COR Odyssey Classic imaging system (LI-COR Biosciences, Lincoln, NE), and band intensities were plotted and then quantified with local background subtraction using the Gel Analyzer tool in FIJI (ImageJ v. 2.0.0-rc-65/1.51s).

#### *Egress assay*

Calcium induced egress assays were performed as previously described (Heaslip et al., 2011). KI:cKD parasites were maintained in -Shld1/-ATc medium and cKD parasites were cultured in +Shld1/-ATc medium. For ATc treatment (-Shld1/+ATc), KI:cKD and

827 cKD parasites were treated with 270 nM ATc and no Shld1 for ~46-52 h, prior to the  
828 egress assay.

829

830

### 831 *Evacuole assay*

832 Evacuole assays were performed as previously described (Hakansson et al., 2001) except  
833 the parasites were harvested and resuspended in ENDO buffer (44.7 mM K<sub>2</sub>SO<sub>4</sub>, 10 mM  
834 MgSO<sub>4</sub>, 106 mM sucrose, 5 mM glucose, 20 mM Tris-H<sub>2</sub>SO<sub>4</sub>, 3.5 mg/mL BSA, adjusted  
835 to pH 8.2) (Endo and Yagita, 1990) prior to induction of evacuole formation with 1 μM  
836 cytochalasin D in DMEM medium supplemented with 1% (v/v) cosmic calf serum.  
837 KI:cKD parasites were cultured in -Shld1/-ATc medium and cKD parasites were cultured  
838 in +Shld1/-ATc medium. For ATc treatment (-Shld1/+ATc), KI:cKD and cKD parasites  
839 were treated with 270 nM ATc and no Shld1 for ~48 h prior to the evacuole assay. Anti-  
840 ROP2,3,4 antibody was used for visualizing rhoptry discharge. Note that for KI:cKD -  
841 Shld1/±ATc, and cKD +Shld1/-ATc, the mean and standard errors were calculated from  
842 10 randomly selected fields. For cKD -Shld1/+ATc, the mean and standard error were  
843 calculated from 10 fields that had at least one evacuole each. The mean thus  
844 overestimates the efficiency of evacuole formation under this condition as most fields did  
845 not contain any evacuoles.

846

847

### 848 *Pulse invasion assay for analyzing moving junction formation*

849 Pulse invasion assays were performed as previously described (Parussini et al., 2012)  
850 with some modifications. For ATc treatment (-Shld1/+ATc), cKD parasites were treated  
851 with 270 nM ATc and no Shld1 for 48 h prior to the pulse invasion assay. Parasites were  
852 harvested from large vacuoles and resuspended in ENDO (invasion non-permissive)  
853 buffer pre-warmed to 37°C, added to a ~90% confluent HFF monolayer in a 3.5 cm  
854 glass-bottom dish, and incubated at 37°C for 30 min. The ENDO buffer was gently  
855 exchanged with invasion permissive medium (DMEM + 1% (v/v) heat-inactivated  
856 cosmic calf serum) pre-warmed to 37°C. RHΔhx (wild-type) parasites and cKD parasites  
857 maintained in +Shld1/-ATc medium were allowed to invade at 37°C for 1 min 30 s; cKD  
858 parasites treated with ATc (-Shld1/+ATc) were allowed to invade for 1 min 30 s, 2 min  
859 30 s, 4 min, 8 min, and 18 min. The dishes were washed once with DPBS prior to  
860 immunofluorescence labelling as described above.

861

862

### 863 *Intracellular replication assay*

864 Intracellular replication assays were performed as previously described (Heaslip et al.,  
865 2010), except parasites were grown for 12, 24, 36, 60, 72 or 84 h in medium with no drug  
866 supplementation (-Shld1/-ATc), with 125 nM Shld1 (+Shld1/-ATc) or with 270 nM ATc  
867 (-Shld1/+ATc). To ensure that the number of parasites in a vacuole was countable, for  
868 the last three timepoints (*i.e.*, 60, 72 and 84 h), parasites were first cultured for 48 h in  
869 T12.5cm<sup>2</sup> flasks in the indicated conditions (-Shld1/-ATc, +Shld1/-ATc, or -  
870 Shld1/+ATc), released by mechanical disruption of the host cell monolayer, then used to  
871 inoculate dishes containing the same medium conditions as the originating flasks, for an  
872 additional 12, 24 or 36 h. At each timepoint, dishes were processed for

873 immunofluorescence as described above, using antibodies for markers of the mother and  
874 daughter cortex (TgIMC1), centrioles (TgCEN3), basal complex (TgIAP1) and a  
875 fluorescent nucleic acid stain (DAPI) to count the number of parasites per vacuole and to  
876 assess the percentage of replication defects. The number of parasites per vacuole was  
877 determined as 2, 4, 8,  $\geq 16$  or "odd" (*i.e.*, where the number of parasites was less than 16,  
878 and not an integral power of 2). For Figure 6B, vacuoles with any of the following  
879 phenotypes were classified as having replication defects: an odd number of parasites,  
880 enlarged parasites, parasites with multiple nuclei or none at all, and parasites with a  
881 single daughter or more than two daughters. Note that for Figure 6C, particularly at the  
882 36 h and 84 h timepoints, there were many very large vacuoles containing from 16 to  
883 upwards of  $\sim 128$  parasites. However, since the precise number of parasites within each  
884 of these vacuoles could not be calculated, they were grouped into the "16 or more  
885 parasites" bin and assigned four doublings (four rounds of replication, equivalent to 16  
886 parasites). Therefore, the replication rates for these timepoints are an underestimate of  
887 the actual replication rate.  
888

889 For every timepoint, a minimum of 200 vacuoles was assessed for each parasite  
890 line and condition in each of three independent biological replicates, except for the cKD  
891 parasites treated with ATc, in which 100 vacuoles were quantified per timepoint because  
892 its invasion deficiency resulted in many fewer vacuoles formed. Data were analyzed  
893 using two-way ANOVA and Bonferroni's multiple comparisons tests with GraphPad  
894 Prism v7 (La Jolla, CA). Where statistically significant, multiplicity adjusted P values  
895 for comparisons are indicated with asterisks.

896  
897  
898

## 899 **ACKNOWLEDGEMENTS**

900 We thank Dr. Owen Saxton (Murray-Edwards College, University of Cambridge, United  
901 Kingdom) for the Semper image processing software, Drs. Con Beckers (University of  
902 North Carolina, Chapel Hill) for the rabbit anti-TgIMC1 and anti-TgMLC1 antibodies,  
903 Peter Bradley (University of California, Los Angeles) for the mouse anti-TgISP1  
904 antibody, Vern Carruthers (University of Michigan, Ann Arbor) for the mouse mAb  
905 6D10 anti-TgMIC2 antibody and rabbit anti-TgPLP1 antibodies, Jean-François  
906 Dubremetz (Université de Montpellier, Montpellier, France) for the mouse anti-ROP2,3,4  
907 antibody, Lloyd Kasper (Dartmouth College, Lebanon, NH) for the rabbit anti-TgSAG1  
908 antibody, Maryse Lebrun (Université de Montpellier, Montpellier, France) for the rabbit  
909 anti-RON2-4, rabbit anti-RON4, and mouse anti-TgMIC3 antibodies, David Roos  
910 (University of Pennsylvania, Philadelphia, PA) and Geoff McFadden (University of  
911 Melbourne, Melbourne, Australia) for the rabbit anti-ACP antibody, Gary Ward  
912 (University of Vermont, Burlington) for the mouse anti-GRA8 and mouse anti-IMC1  
913 antibodies, Richard Day (Indiana University School of Medicine, Indianapolis, IN) for  
914 the pmAppleFP-C1 plasmid, Dominique Soldati-Favre (University of Geneva, Geneva,  
915 Switzerland) for the TetO7Sag4\_mycGFP and ptub8-TATi1-HX plasmids, Tom  
916 Wandless (Stanford University, Stanford, CA) for Shield-1, and the Seattle Structural  
917 Genomics Center for Infectious Disease (Seattle, WA) for the purified recombinant  
918 TgCEN3 and TgIAP1. We thank Christiane Hassel of the Indiana University  
919 Bloomington (IUB) Flow Cytometry Core Facility for assistance with flow cytometry,

920 and Dr. James Powers of the IUB Light Microscopy Imaging Facility for assistance and  
921 support with light microscopy (NIH S10-RR028697). We would also like to thank Dr.  
922 Amanda Rollins and Qing Zhang for technical support. This study was supported by  
923 American Heart Association Postdoctoral Fellowships (16POST31330004 and  
924 18POST34090005) awarded to J.M.L., and funding from the March of Dimes (6-FY18-  
925 674), the National Institutes of Health/National Institute of Allergy and Infectious  
926 Diseases (R01-AI132463) awarded to K.H., and facility funding from the Indiana  
927 Clinical and Translational Sciences Institute to K.H., funded in part by Grant UL1  
928 TR001108 from a National Institutes of Health, National Center for Advancing  
929 Translational Sciences, Clinical and Translational Sciences Award.

930 **FIGURE LEGENDS:**

931

932 **Figure 1.** Phylogenetic analysis of selected centrin homologs and the localization of  
933 TgCentrin2 (CEN2) in *Toxoplasma gondii*

934

935 (A) Alignment of TgCentrin1-3 (TgCEN1-3) and selected centrin homologs in other  
936 organisms using the multiple alignment program MUSCLE. PfCEN2 XP\_001348617.1  
937 (GenBank), GnCEN2 XP\_011129982.1, TgCEN2 TGGT1\_250340 (ToxoDB), Pt\_Efh  
938 XP\_001441649.1, Tt\_caltractin XP\_001023350.1b, ScCEN NP\_014900.3, AtCEN2  
939 NP\_190605.1, CrCEN XP\_001699499.1, TgCEN1 TGGT1\_247230, HsCEN2  
940 NP\_004335.1, HsCEN1 NP\_004057.1, TgCEN3 TGGT1\_260670, HsCEN3  
941 NP\_004356.2, Pf: *Plasmodium falciparum*; Gn: *Gregarina niphandrodes*; Tg:  
942 *Toxoplasma gondii*; Pt: *Paramecium tetraurelia*; Tt: *Tetrahymena thermophila*; Sc:  
943 *Saccharomyces cerevisiae*; At: *Arabidopsis thaliana*; Cr: *Chlamydomonas reinhardtii*;  
944 Hs: *Homo sapiens*.

945

946 (B) Cartoon of an interphase parasite, in which CEN2-containing structures are  
947 highlighted in green. Pcr: pre-conoidal rings; PA: peripheral annuli; C: centrioles; BC:  
948 basal complex; AC: apical complex; PM: plasma membrane; IMC: inner membrane  
949 complex; Cortical MTs: cortical microtubules.

950

951 (C-G) Projections of 3D-SIM images of *eGFP-CEN2* knock-in parasites at different  
952 stages of the cell cycle labeled with a mouse anti-ISP1 antibody. Insets (2X) in C, D, and  
953 F are contrast enhanced and include regions indicated by the arrows. Dashed lines in C,  
954 D, and G indicate the approximate outline of one of the two parasites in the same  
955 vacuole. The cartoon in G highlights the localization of CEN2 (green) and ISP1 (red)  
956 with respect to the inner membrane complex (IMC) and the plasma membrane. "M-":  
957 mother structures. "D-": daughter structures. D: daughter. Other abbreviations are the  
958 same as in (B). Green: *eGFP-CEN2*; Red: anti-ISP1. Scale bar = 2  $\mu$ m.

959

960 (H) Fluorescence (top) and fluorescence/DIC overlay (bottom) images of *eGFP-CEN2*  
961 knock-in parasites ~48 h after transfection with a plasmid expressing Cre recombinase.  
962 There are two vacuoles in the field. Dashed circles indicate the vacuole in which *eGFP-*  
963 *CEN2* expression has decreased significantly. Inset (1X) is contrast enhanced to  
964 visualize residual *eGFP-CEN2* signal in the centrioles (arrows) and basal complex  
965 (arrowheads) of the parasites in this vacuole. Scale bar = 5  $\mu$ m.

966

967

968 **Figure 2.** Generation of the *CEN2* knock-in and cKD parasite lines.

969

970 (A) Schematic for generating *eGFP-CEN2* knock-in (KI), *eGFP-CEN2* knock-in:cKD  
971 (KI:cKD) and cKD parasites and Southern blotting strategy. Positions of the *ScaI*  
972 restriction sites, CDS probe (blue) and the probe annealing upstream of the *CEN2* coding  
973 sequence (5'UTR probe, red) used in the Southern blotting analysis and the  
974 corresponding expected DNA fragment sizes are indicated as shown.

975

976 (B) Southern blotting analysis of the *CEN2* locus in RH $\Delta$ hx parasites (WT), KI, KI:cKD,  
977 and cKD parasites. For the CDS probe, the expected parasite genomic DNA fragment  
978 sizes after *ScaI* digestion are 8696 base pairs for the WT (*i.e.*, wild-type *CEN2* locus),  
979 10,630 base pairs for the *eGFP-CEN2* cassette in the KI and KI:cKD parasites, and



980 variable for the multiple, random integrations of the cKD plasmid (pTATi1-TetO7Sag4-  
981 ddFKBP-mAppleFP-CEN2) since the fragment sizes would depend on where the plasmid  
982 integrated relative to *ScaI* sites in the parasite genome. The expected DNA fragment  
983 sizes for the upstream probe are the same as for the CDS probe for the WT, KI, and  
984 KI:cKD parasites, and 6960 base pairs for the cKD parasites after Cre excision of the  
985 eGFP-CEN2 cassette. L: ladder.  
986

987

988 **Figure 3.** Quantification of CEN2 downregulation in cKD parasites, and ultrastructural  
989 analysis of the cytoskeletal apical complex in *CEN2* depleted parasites.  
990

991 (A) Representative fluorescence and DIC images of cKD parasites in two to four parasite  
992 vacuoles cultured in the presence of Shld1 (+Shld1/-ATc), or 12, 24, and 48 h after  
993 withdrawal of Shld1 and addition of ATc (-Shld1/+ATc). The image of the vacuole  
994 cultured in -Shld1/+ATc medium for 48 h is representative of vacuoles imaged at  
995 subsequent timepoints (*i.e.*, 72, 96, and 120 h -Shld1/+ATc). Individual parasites are  
996 outlined in purple, dashed lines. The image of the cKD +Shld1/-ATc parasites is  
997 additionally marked with dashed lines to mark the four compartments that CEN2 targets:  
998 the preconoidal rings (red), peripheral annuli (orange), centrioles (green), and basal  
999 complex (blue). Images in each row were acquired and processed under the same  
1000 conditions. Images in the middle row were highly contrast enhanced to display low  
1001 mAppleFP-CEN2 signal in the parasites. Scale bar = 2  $\mu$ m.  
1002

1003 (B) Intensity measurements of mAppleFP-CEN2 in the preconoidal rings (red),  
1004 peripheral annuli (orange), centrioles (green) and basal complex (blue) in cKD parasites  
1005 12-120 h after -Shld1/-ATc (dashed lines) or -Shld1/+ATc treatment (solid lines).  
1006 Baseline: average mAppleFP intensity of individual CEN2 containing structures in cKD  
1007 parasites cultured in +Shld1/-ATc. Note that the two segments of the y-axis are scaled  
1008 differently to facilitate better visualization of the lower photon counts in the later  
1009 timepoints. Error bars: standard error.  
1010

1011 (C) Fluorescence images of cKD parasites cultured in the presence of Shld1 (+Shld1/-  
1012 ATc) or treated for 14 h with ATc and no Shld1 (-Shld1/+ATc), in single parasite  
1013 vacuoles before or undergoing the first round of cytokinesis post-invasion. Dashed  
1014 circles indicate daughters emerging from the mother parasite. The blue and white arrows  
1015 indicate the preconoidal rings in the maternal cytoskeleton and newly assembled  
1016 daughters, respectively, and the white arrowheads indicate daughter centrioles. The  
1017 daughter basal complexes indicated by the purple arrows are included in the insets (1X,  
1018 contrast enhanced). Scale bar = 2  $\mu$ m.  
1019

1020 (D) Negative staining of whole mount, detergent-extracted parasites to visualize the  
1021 apical cytoskeletal structure of wild-type parasites (WT), cKD parasites cultured in the  
1022 presence of Shld1 (cKD, +Shld1/-ATc) or treated for 144 h with ATc and no Shld1 (cKD  
1023 -Shld1/+ATc). The structure of the preconoidal rings (black arrows) appears to be  
1024 normal after CEN2 depletion, but the intra-conoid microtubules (red arrows) are not  
1025 detectable in some CEN knockdown parasites (cKD, -Shld1/+ATc, bottom row). Scale  
1026 bar = 200 nm.  
1027

1028

1029 **Figure 4.** The effect of CEN2 downregulation on the parasite lytic cycle.  
1030

1031 Plaques formed in the presence of 0, 68, 135, 270, 540 and 1080 nM ATc and without  
1032 Shld1 by the KI:cKD and cKD parasites. The KI:cKD parasites were maintained in -  
1033 Shld1/-ATc medium and the cKD parasites were maintained in +Shld1/-ATc medium  
1034 prior to the plaque assay. "Pre-treat": The cKD parasites were pre-treated for ~48 h with  
1035 no drug (-Shld1/-ATc), or 270 nM ATc (-Shld1/+ATc). Each well of HFF monolayers  
1036 was infected with 100 parasites, grown for 6 days at 37°C, and then fixed and stained  
1037 with crystal violet. Host cells that remained intact absorbed the crystal violet staining,  
1038 whereas regions of host cells lysed by the parasites ("plaques") are clear.  
1039

1040

1041 **Figure 5.** The effect of CEN2 downregulation on parasite invasion, microneme secretion,  
1042 egress, evacuole formation, and moving junction formation.  
1043

1044 (A) Representative wide-field epifluorescence images of invasion by RH $\Delta$ *hx* parasites  
1045 (WT), and cKD parasites treated with ATc (-Shld1/+ATc) for 16 h. Parasites that are  
1046 intracellular (*i.e.*, have successfully invaded) are labeled green, and parasites that did not  
1047 invade are labeled both green and red (*i.e.*, appear yellow). Scale bar = 20  $\mu$ m.  
1048

1049 (B) Quantification of the mean number of invaded parasites per field for RH $\Delta$ *hx* parasites  
1050 (WT), and cKD parasites treated with ATc (-Shld1/+ATc) for 16 h or 40 h after Shld1  
1051 withdrawal (mean + standard error). \*\*: P value < 0.01.  
1052

1053 (C) Representative wide-field epifluorescence images of invasion by RH $\Delta$ *hx* parasites  
1054 (WT), KI:cKD treated with ATc for 48 h, and cKD parasites cultured with Shld1  
1055 (+Shld1/-ATc), or treated with ATc (-Shld1/+ATc) for 48 h. Scale bar = 20  $\mu$ m.  
1056

1057 (D) Quantification of the mean number of invaded parasites per field for RH $\Delta$ *hx* parasites  
1058 (WT), KI:cKD cultured in -Shld1/-ATc, treated with ATc (-Shld1/+ATc) for 48 h, and  
1059 cKD parasites cultured with Shld1 (+Shld1/-ATc), no drug (-Shld1/-ATc), or treated with  
1060 ATc (-Shld1/+ATc) for 48 h (mean + standard error). \*: 0.01 < P value < 0.05. \*\*: P  
1061 value < 0.01.

1062 See also Table 1 for quantification of invasion efficiency relative to WT parasites and the  
1063 matrix of pairwise P values.  
1064

1065 (E) Percentage of vacuoles (mean + 2 standard errors) from which parasites activated  
1066 motility to egress within ~6 min of treatment with 5  $\mu$ M A23187. For each sample, a  
1067 total of 12 randomly selected fields in two different dishes were analyzed. The color  
1068 coding for each condition is as indicated and the same as in (G&H).  
1069

1070 (F) The unsecreted (pellet, P) and secreted (supernatant, S) fractions of *eGFP-CEN2*  
1071 knock-in:cKD (KI:cKD, -Shld1/-ATc or -Shld1/+ATc) and cKD (+Shld1/-ATc or -  
1072 Shld1/+ATc) parasites upon ethanol stimulation, as probed by antibodies against MIC2,  
1073 MIC3, PLP1, and GRA8, with MLC1 in the pellets as a loading control. The numbers on  
1074 the left indicate molecular masses in kDa.  
1075

1076 (G) Levels of MIC2, MIC3, PLP1, and GRA8 in the secreted fractions, and MIC2 in the  
1077 pellet fractions relative to those from KI:cKD, -Shld1/-ATc. The levels shown for MIC2  
1078 in the pellet were normalized to the levels of MLC1 in the pellet for each sample. Error

1079 bars: + standard error. \*:  $0.01 < P \text{ value} < 0.05$ . \*\*:  $0.001 < P \text{ value} \leq 0.01$ . \*\*\*\*:  $P \text{ value}$   
1080  $< 0.0001$ . Results are from at least three independent biological replicates.

1081  
1082 (H) Mean number of evacuoles observed per field, formed by parasites upon treatment  
1083 with cytochalasin D. The color coding for each condition is the same as in (E). Error  
1084 bars: + standard error. \*:  $0.01 < P \text{ value} < 0.05$ . \*\*\*\*:  $P \text{ value} < 0.0001$ . Note that for  
1085 KI:cKD -Shld1/ $\pm$ ATc, and cKD +Shld1/-ATc, the mean and standard error were  
1086 calculated from 10 randomly selected fields. For cKD -Shld1/+ATc, the mean and  
1087 standard error were calculated from 10 fields that had at least one evacuole each. The  
1088 mean thus overestimates the efficiency of evacuole formation under this condition as  
1089 most fields did not contain any evacuoles.

1090  
1091 (I) Wide-field deconvolution images of RH $\Delta$ hx parasites (WT) and cKD parasites  
1092 cultured with Shld1 (+Shld1/-ATc), or treated with ATc for 48 h after Shld1 withdrawal  
1093 (-Shld1/+ATc), in which RON4 (green), and IMC1 (red, a marker for the cortex of  
1094 mature and daughter parasites) were labeled by immunofluorescence after extracellular  
1095 parasites were incubated with host cells for a short period of time (*i.e.* "pulse invasion").  
1096 Moving junctions (arrows) were readily observed for the WT and the cKD +Shld1/-ATc  
1097 parasites, but never for CEN2 depleted parasites (cKD, -Shld1/+ATc, 48 h). The RON4  
1098 signal (arrowhead) close to the middle of the CEN2 depleted parasite might associate  
1099 with the Golgi or other organelles in the secretory pathway. Scale bar = 2  $\mu\text{m}$ .

1100  
1101 (J) Representative wide-field deconvolution images of RH $\Delta$ hx parasites (WT) and cKD  
1102 parasites cultured with Shld1 (+Shld1/-ATc), or treated with ATc for 48 h after Shld1  
1103 withdrawal (-Shld1/+ATc), in which IMC1 (green) and MIC2 (red) were labeled by  
1104 immunofluorescence. Scale bar = 2  $\mu\text{m}$ .

1105  
1106  
1107

1108 **Figure 6.** The effect of CEN2 downregulation on parasite replication.

1109  
1110 (A) Comparison of the intracellular growth of cKD parasites treated with ATc (cKD, -  
1111 Shld1/+ATc) with that of RH $\Delta$ hx (WT), KI:cKD (-Shld1/-ATc or -Shld1/+ATc) and cKD  
1112 parasites cultured with Shld1 (cKD +Shld1/-ATc) parasites at 12, 24, 36, 60 (48+12), 72  
1113 (48+24), and 84 (48+36) h after drug removal/addition. To facilitate parasite counting  
1114 after extended (>48 h) drug treatment times, dishes for the last three timepoints were  
1115 inoculated with parasites that had been cultured for 48 h in T12.5cm<sup>2</sup> flasks under the  
1116 indicated conditions, and allowed to invade a fresh HFF monolayer and proliferate for 12,  
1117 24, and 36 h under the corresponding conditions. "Odd", vacuoles in which the number  
1118 of parasites was less than 16, and not an integral power of 2. " $\geq 16$ ", vacuoles that  
1119 contained 16 or more parasites.

1120  
1121 (B) Percentage of vacuoles containing parasites with replication defects. Phenotypes  
1122 include an odd number of parasites, enlarged parasites, parasites with multiple nuclei or  
1123 none at all, and parasites with a single daughter or more than two daughters.

1124  
1125 (C) Mean replication (doubling) rate. Note that particularly at the 36 h and 84 (48+36) h  
1126 timepoints, there were many very large vacuoles containing from 16 to upwards of ~128  
1127 parasites. However, since the precise number of parasites within each of these large  
1128 vacuoles could not be calculated, they were grouped into the "16 or more parasites" bin

1129 and assigned four doublings (four rounds of replication, equivalent to 16 parasites).  
 1130 Therefore, the replication rates for these timepoints are an underestimate of the actual  
 1131 replication rate. Error bars: standard error. \*\*: 0.001 < P value < 0.01. \*\*\*\*: P value <  
 1132 0.0001 (two-way ANOVA and Bonferroni's multiple comparisons test), when cKD  
 1133 parasites were compared with RHΔhx (WT) or KI:cKD parasites as measured in three  
 1134 independent biological replicates.  
 1135  
 1136

1137 **Figure 7.** CEN2 knockdown results in abnormal replication patterns.

1139 (A) Representative images of untreated RHΔhx parasites (WT) at the 24 h timepoint of  
 1140 the replication assays in Figure 6. TgCentrin3 (CEN3), marker for the centrioles (red  
 1141 arrows); TgIMC1 (IMC1), marker for the cortex of mature and daughter parasites; DAPI,  
 1142 fluorescent nucleic acid stain. Scale bar = 2 μm.  
 1143

1144 (B) Images of a vacuole of cKD parasites treated with ATc (-Shld1/+ATc) for 24 h  
 1145 undergoing normal replication. Scale bar = 2 μm.  
 1146

1147 (C&D) Images of one vacuole of cKD parasites treated with ATc (-Shld1/+ATc) for 84 h  
 1148 with more than two daughters forming inside the mother (C, white arrowheads) and  
 1149 another vacuole with parasites that are swollen with large or multiple nuclei (D, white  
 1150 arrows). Notice the uneven distribution of the centrioles (red arrows). Red arrowheads  
 1151 indicate some daughter parasites that receive no centrioles. Scale bars = 2 μm.  
 1152  
 1153

1154 **Table 1.** Quantification of invasion [mean number of intracellular parasites per field ±  
 1155 standard error (SE)] by RHΔhx parasites (WT), KI:cKD and cKD parasites with Shld1  
 1156 (+Shld1/-ATc), no drug (-Shld1/-ATc), or ATc (-Shld1/+ATc). See also Figure 5. The  
 1157 number of intracellular parasites per field was counted in 15 fields per parasite line or  
 1158 treatment, in each of three independent biological replicates. P values from unpaired,  
 1159 two-tailed Student's *t* tests are indicated on the right.

| A                         |                     |      | P value    |                        |                         |                 |                       |                       |
|---------------------------|---------------------|------|------------|------------------------|-------------------------|-----------------|-----------------------|-----------------------|
|                           |                     |      | RHΔhx (WT) | cKD, -Shld1/+ATc; 16 h | cKD, -Shld1/+ATc; 40 h  |                 |                       |                       |
| Strain                    | Number invaded ± SE | % WT |            |                        |                         |                 |                       |                       |
| RHΔhx (WT)                | 103 ± 12            | 100  |            | <b>0.009</b>           | <b>0.0019</b>           |                 |                       |                       |
| cKD, -Shld1/+ATc; 16 h    | 31 ± 10             | 30   |            |                        | 0.2118                  |                 |                       |                       |
| cKD, -Shld1/+ATc; 40 h    | 16 ± 1              | 16   |            |                        |                         |                 |                       |                       |
| B                         |                     |      | P value    |                        |                         |                 |                       |                       |
|                           |                     |      | RHΔhx (WT) | KI:cKD -Shld1/-ATc     | KI:cKD -Shld1/+ATc 48 h | cKD +Shld1/-ATc | cKD, -Shld1/-ATc 48 h | cKD, -Shld1/+ATc 48 h |
| Strain                    | Number invaded ± SE | % WT |            |                        |                         |                 |                       |                       |
| RHΔhx (WT)                | 103 ± 12            | 100  |            | 0.1208                 | 0.4845                  | <b>0.033</b>    | <b>0.0071</b>         | <b>0.0014</b>         |
| KI:cKD, -Shld1/-ATc       | 129 ± 6             | 125  |            |                        | 0.4163                  | <b>0.0021</b>   | <b>0.0007</b>         | <b>0.0001</b>         |
| KI:cKD, -Shld1/+ATc; 48 h | 117 ± 13            | 113  |            |                        |                         | <b>0.0171</b>   | <b>0.0046</b>         | <b>0.0011</b>         |
| cKD, +Shld1/-ATc          | 58 ± 8              | 56   |            |                        |                         |                 | 0.0756                | <b>0.005</b>          |
| cKD, -Shld1/-ATc; 48 h    | 29 ± 9              | 28   |            |                        |                         |                 |                       | 0.1119                |
| cKD, -Shld1/+ATc; 48 h    | 11 ± 2              | 10   |            |                        |                         |                 |                       |                       |

1160 P values lower than 0.05 are indicated in **bold**.

1161

1162 REFERENCES

- 1163 **Alexander, D. L., Mital, J., Ward, G. E., Bradley, P. and Boothroyd, J. C.**  
1164 (2005). Identification of the moving junction complex of *Toxoplasma gondii*: a  
1165 collaboration between distinct secretory organelles. *PLoS Pathog* **1**, e17.
- 1166 **Amos, W. B., Routledge, L. M. and Yew, F. F.** (1975). Calcium-binding  
1167 proteins in a vorticellid contractile organelle. *J Cell Sci* **19**, 203-13.
- 1168 **Banaszynski, L. A., Chen, L. C., Maynard-Smith, L. A., Ooi, A. G. and**  
1169 **Wandless, T. J.** (2006). A rapid, reversible, and tunable method to regulate protein  
1170 function in living cells using synthetic small molecules. *Cell* **126**, 995-1004.
- 1171 **Beck, J. R., Chen, A. L., Kim, E. W. and Bradley, P. J.** (2014). RON5 is  
1172 critical for organization and function of the *Toxoplasma* moving junction complex. *PLoS*  
1173 *Pathogens* **10**, e1004025.
- 1174 **Beck, J. R., Rodriguez-Fernandez, I. A., Cruz de Leon, J., Huynh, M. H.,**  
1175 **Carruthers, V. B., Morrissette, N. S. and Bradley, P. J.** (2010). A novel family of  
1176 *Toxoplasma* IMC proteins displays a hierarchical organization and functions in  
1177 coordinating parasite division. *PLoS Pathog* **6**.
- 1178 **Black, M. W. and Boothroyd, J. C.** (2000). Lytic cycle of *Toxoplasma gondii*.  
1179 *Microbiol Mol Biol Rev* **64**, 607-23.
- 1180 **Bullen, H. E., Jia, Y., Yamaryo-Botte, Y., Bisio, H., Zhang, O., Jemelin, N.**  
1181 **K., Marq, J. B., Carruthers, V., Botte, C. Y. and Soldati-Favre, D.** (2016).  
1182 Phosphatidic Acid-Mediated Signaling Regulates Microneme Secretion in *Toxoplasma*.  
1183 *Cell Host Microbe* **19**, 349-60.
- 1184 **Carey, K. L., Donahue, C. G. and Ward, G. E.** (2000). Identification and  
1185 molecular characterization of GRA8, a novel, proline-rich, dense granule protein of  
1186 *Toxoplasma gondii*. *Molecular and biochemical parasitology* **105**, 25-37.
- 1187 **Carey, K. L., Westwood, N. J., Mitchison, T. J. and Ward, G. E.** (2004). A  
1188 small-molecule approach to studying invasive mechanisms of *Toxoplasma gondii*. *Proc*  
1189 *Natl Acad Sci U S A* **101**, 7433-8.
- 1190 **Carruthers, V. B., Giddings, O. K. and Sibley, L. D.** (1999). Secretion of  
1191 micronemal proteins is associated with *Toxoplasma* invasion of host cells. *Cell Microbiol*  
1192 **1**, 225-235.
- 1193 **Carruthers, V. B., Sherman, G. D. and Sibley, L. D.** (2000). The *Toxoplasma*  
1194 adhesive protein MIC2 is proteolytically processed at multiple sites by two parasite-  
1195 derived proteases. *The Journal of biological chemistry* **275**, 14346-53.
- 1196 **Carruthers, V. B. and Sibley, L. D.** (1997). Sequential protein secretion from  
1197 three distinct organelles of *Toxoplasma gondii* accompanies invasion of human  
1198 fibroblasts. *Eur J Cell Biol* **73**, 114-23.
- 1199 **Cerede, O., Dubremetz, J. F., Soete, M., Deslee, D., Vial, H., Bout, D. and**  
1200 **Lebrun, M.** (2005). Synergistic role of micronemal proteins in *Toxoplasma gondii*  
1201 virulence. *J Exp Med* **201**, 453-63.
- 1202 **Dhara, A., de Paula Baptista, R., Kissinger, J. C., Snow, E. C. and Sinai, A.**  
1203 **P.** (2017). Ablation of an Ovarian Tumor Family Deubiquitinase Exposes the Underlying  
1204 Regulation Governing the Plasticity of Cell Cycle Progression in *Toxoplasma gondii*.  
1205 *mBio* **8**.
- 1206 **Endo, T. and Yagita, K.** (1990). Effect of extracellular ions on motility and cell  
1207 entry in *Toxoplasma gondii*. *J. Protozool.* **37**, 133-138.



- 1208 **Fang, J., Marchesini, N. and Moreno, S. N.** (2006). A *Toxoplasma gondii*  
1209 phosphoinositide phospholipase C (TgPI-PLC) with high affinity for  
1210 phosphatidylinositol. *The Biochemical journal* **394**, 417-25.
- 1211 **Fox, B. A., Ristuccia, J. G., Gigley, J. P. and Bzik, D. J.** (2009). Efficient gene  
1212 replacements in *Toxoplasma gondii* strains deficient for nonhomologous end joining.  
1213 *Eukaryot Cell* **8**, 520-9.
- 1214 **Francia, M. E., Jordan, C. N., Patel, J. D., Sheiner, L., Demerly, J. L.,**  
1215 **Fellows, J. D., de Leon, J. C., Morrissette, N. S., Dubremetz, J.-F. and Striepen, B.**  
1216 (2012). Cell division in Apicomplexan parasites is organized by a homolog of the striated  
1217 rootlet fiber of algal flagella. *PLoS biology* **10**, e1001444.
- 1218 **Frenal, K., Marq, J. B., Jacot, D., Polonais, V. and Soldati-Favre, D.** (2014).  
1219 Plasticity between MyoC- and MyoA-glideosomes: an example of functional  
1220 compensation in *Toxoplasma gondii* invasion. *PLoS Pathog* **10**, e1004504.
- 1221 **Gaskins, E., Gilk, S., DeVore, N., Mann, T., Ward, G. and Beckers, C.** (2004).  
1222 Identification of the membrane receptor of a class XIV myosin in *Toxoplasma gondii*.  
1223 *The Journal of cell biology* **165**, 383-93.
- 1224 **Gras, S., Jackson, A., Woods, S., Pall, G., Whitelaw, J., Leung, J. M., Ward,**  
1225 **G. E., Roberts, C. W. and Meissner, M.** (2017). Parasites lacking the micronemal  
1226 protein MIC2 are deficient in surface attachment and host cell egress, but remain virulent  
1227 in vivo. *Wellcome Open Res* **2**, 32.
- 1228 **Hakansson, S., Charron, A. J. and Sibley, L. D.** (2001). *Toxoplasma* vacuoles:  
1229 a two-step process of secretion and fusion forms the parasitophorous vacuole. *The EMBO*  
1230 *journal* **20**, 3132-44.
- 1231 **Heaslip, A. T., Dzierszynski, F., Stein, B. and Hu, K.** (2010). TgMORN1 is a  
1232 key organizer for the basal complex of *Toxoplasma gondii*. *PLoS Pathog* **6**, e1000754.
- 1233 **Heaslip, A. T., Ems-McClung, S. C. and Hu, K.** (2009). TgICMAP1 is a novel  
1234 microtubule binding protein in *Toxoplasma gondii*. *PLoS One* **4**, e7406.
- 1235 **Heaslip, A. T., Nishi, M., Stein, B. and Hu, K.** (2011). The motility of a human  
1236 parasite, *Toxoplasma gondii*, is regulated by a novel lysine methyltransferase. *PLoS*  
1237 *Pathog* **7**, e1002201.
- 1238 **Herm-Gotz, A., Agop-Nersesian, C., Munter, S., Grimley, J. S., Wandless, T.**  
1239 **J., Frischknecht, F. and Meissner, M.** (2007). Rapid control of protein level in the  
1240 apicomplexan *Toxoplasma gondii*. *Nat Methods* **4**, 1003-5.
- 1241 **Hortua Triana, M. A., Marquez-Nogueras, K. M., Chang, L., Stasic, A. J., Li,**  
1242 **C., Spiegel, K. A., Sharma, A., Li, Z. H. and Moreno, S. N. J.** (2018). Tagging of  
1243 Weakly Expressed *Toxoplasma gondii* Calcium-Related Genes with High-Affinity Tags.  
1244 *The Journal of eukaryotic microbiology* **65**, 709-721.
- 1245 **Hu, K.** (2008). Organizational Changes of the Daughter Basal Complex during  
1246 the Parasite Replication of *Toxoplasma gondii*. *PLoS Pathogens* **4**, 108-121.
- 1247 **Hu, K., Johnson, J., Florens, L., Fraunholz, M., Suravajjala, S., Dilullo, C.,**  
1248 **Yates, J., Roos, D. S. and Murray, J. M.** (2006). Cytoskeletal Components of an  
1249 Invasion Machine-The Apical Complex of *Toxoplasma gondii*. *PLoS Pathog* **2**, e13.
- 1250 **Hu, K., Mann, T., Striepen, B., Beckers, C. J., Roos, D. S. and Murray, J. M.**  
1251 (2002). Daughter cell assembly in the protozoan parasite *Toxoplasma gondii*. *Mol Biol*  
1252 *Cell* **13**, 593-606.

- 1253 **Huynh, M. H. and Carruthers, V. B.** (2006). *Toxoplasma* MIC2 is a major  
1254 determinant of invasion and virulence. *PLoS Pathog* **2**, e84.
- 1255 **Huynh, M. H. and Carruthers, V. B.** (2009). Tagging of endogenous genes in a  
1256 *Toxoplasma gondii* strain lacking Ku80. *Eukaryot Cell* **8**, 530-9.
- 1257 **Huynh, M. H., Rabenau, K. E., Harper, J. M., Beatty, W. L., Sibley, L. D.**  
1258 **and Carruthers, V. B.** (2003). Rapid invasion of host cells by *Toxoplasma* requires  
1259 secretion of the MIC2-M2AP adhesive protein complex. *The EMBO journal* **22**, 2082-90.
- 1260 **Kafsack, B. F. C., Pena, J. D. O., Coppens, I., Ravindran, S., Boothroyd, J. C.**  
1261 **and Carruthers, V. B.** (2009). Rapid membrane disruption by a perforin-like protein  
1262 facilitates parasite exit from host cells. *Science* **323**, 530-3.
- 1263 **Lamarque, M., Besteiro, S., Papoin, J., Roques, M., Vulliez-Le Normand, B.,**  
1264 **Morlon-Guyot, J., Dubremetz, J. F., Fauquenoy, S., Tomavo, S., Faber, B. W. et al.**  
1265 (2011). The RON2-AMA1 interaction is a critical step in moving junction-dependent  
1266 invasion by apicomplexan parasites. *PLoS Pathog* **7**, e1001276.
- 1267 **Lebrun, M., Michelin, A., El Hajj, H., Poncet, J., Bradley, P. J., Vial, H. and**  
1268 **Dubremetz, J. F.** (2005). The rhoptry neck protein RON4 re-localizes at the moving  
1269 junction during *Toxoplasma gondii* invasion. *Cell Microbiol* **7**, 1823-33.
- 1270 **Leriche, M. A. and Dubremetz, J. F.** (1991). Characterization of the protein  
1271 contents of rhoptries and dense granules of *Toxoplasma gondii* tachyzoites by subcellular  
1272 fractionation and monoclonal antibodies. *Mol. Biochem. Parasitol.* **45**, 249-260.
- 1273 **Leung, J. M., He, Y., Zhang, F., Hwang, Y. C., Nagayasu, E., Liu, J., Murray,**  
1274 **J. M. and Hu, K.** (2017). Stability and function of a putative microtubule organizing  
1275 center in the human parasite *Toxoplasma gondii*. *Molecular Biology of the Cell (Featured*  
1276 *as Journal Cover)* **28**, 1361-1378.
- 1277 **Liu, J., He, Y., Benmerzouga, I., Sullivan, W. J., Jr., Morrissette, N. S.,**  
1278 **Murray, J. M. and Hu, K.** (2016). An ensemble of specifically targeted proteins  
1279 stabilizes cortical microtubules in the human parasite *Toxoplasma gondii*. *Mol Biol Cell*  
1280 **27**, 549-71.
- 1281 **Liu, J., Wetzel, L., Zhang, Y., Nagayasu, E., Ems-McClung, S., Florens, L.**  
1282 **and Hu, K.** (2013). Novel thioredoxin-like proteins are components of a protein complex  
1283 coating the cortical microtubules of *Toxoplasma gondii*. *Eukaryot Cell*.
- 1284 **Mann, T. and Beckers, C.** (2001). Characterization of the subpellicular network,  
1285 a filamentous membrane skeletal component in the parasite *Toxoplasma gondii*.  
1286 *Molecular and biochemical parasitology* **115**, 257-68.
- 1287 **Meissner, M., Brecht, S., Bujard, H. and Soldati, D.** (2001). Modulation of  
1288 myosin A expression by a newly established tetracycline repressor-based inducible  
1289 system in *Toxoplasma gondii*. *Nucleic acids research* **29**, E115.
- 1290 **Meissner, M., Schluter, D. and Soldati, D.** (2002). Role of *Toxoplasma gondii*  
1291 myosin A in powering parasite gliding and host cell invasion. *Science* **298**, 837-40.
- 1292 **Mital, J., Meissner, M., Soldati, D. and Ward, G. E.** (2005). Conditional  
1293 expression of *Toxoplasma gondii* apical membrane antigen-1 (TgAMA1) demonstrates  
1294 that TgAMA1 plays a critical role in host cell invasion. *Molecular Biology of the Cell* **16**,  
1295 4341-9.
- 1296 **Mital, J. and Ward, G. E.** (2008). Current and emerging approaches to studying  
1297 invasion in apicomplexan parasites. *Sub-cellular biochemistry* **47**, 1-32.

- 1298 **Murray, J. M.** (2017). An icosahedral virus as a fluorescent calibration standard:  
1299 a method for counting protein molecules in cells by fluorescence microscopy. *J Microsc*  
1300 **267**, 193-213.
- 1301 **Nishi, M., Hu, K., Murray, J. M. and Roos, D. S.** (2008). Organellar dynamics  
1302 during the cell cycle of *Toxoplasma gondii*. *Journal of Cell Science* **121**, 1559-68.
- 1303 **Parussini, F., Tang, Q., Moin, S. M., Mital, J., Urban, S. and Ward, G. E.**  
1304 (2012). Intramembrane proteolysis of *Toxoplasma* apical membrane antigen 1 facilitates  
1305 host-cell invasion but is dispensable for replication. *Proc Natl Acad Sci U S A* **109**, 7463-  
1306 8.
- 1307 **Roos, D. S., Donald, R. G., Morrissette, N. S. and Moulton, A. L.** (1994).  
1308 Molecular tools for genetic dissection of the protozoan parasite *Toxoplasma gondii*.  
1309 *Methods Cell Biol.* **45**, 27-78.
- 1310 **Salisbury, J. L.** (1995). Centrin, centrosomes, and mitotic spindle poles. *Curr*  
1311 *Opin Cell Biol* **7**, 39-45.
- 1312 **Salisbury, J. L.** (2007). A mechanistic view on the evolutionary origin for  
1313 centrin-based control of centriole duplication. *Journal of cellular physiology* **213**, 420-8.
- 1314 **Sanders, M. A. and Salisbury, J. L.** (1994). Centrin plays an essential role in  
1315 microtubule severing during flagellar excision in *Chlamydomonas reinhardtii*. *Journal of*  
1316 *Cell Biology* **124**, 795-805.
- 1317 **Saxton, W., Pitt, T. and Horner, M.** (1979). Digital image processing: the  
1318 Semper system. *Ultramicroscopy* **4**, 343-353.
- 1319 **Schindelin, J., Arganda-Carreras, I., Frise, E., Kaynig, V., Longair, M.,**  
1320 **Pietzsch, T., Preibisch, S., Rueden, C., Saalfeld, S., Schmid, B. et al.** (2012). Fiji: an  
1321 open-source platform for biological-image analysis. *Nature Methods* **9**, 676-82.
- 1322 **Schneider, C. A., Rasband, W. S. and Eliceiri, K. W.** (2012). NIH Image to  
1323 ImageJ: 25 years of image analysis. *Nat Methods* **9**, 671-5.
- 1324 **Sheffield, H. G. and Melton, M. L.** (1968). The fine structure and reproduction  
1325 of *Toxoplasma gondii*. *The Journal of parasitology* **54**, 209-26.
- 1326 **Sidik, S. M., Huet, D., Ganesan, S. M., Huynh, M.-H., Wang, T., Nasamu, A.**  
1327 **S., Thiru, P., Saeij, J. P. J., Carruthers, V. B., Niles, J. C. et al.** (2016). A Genome-  
1328 wide CRISPR Screen in *Toxoplasma* Identifies Essential Apicomplexan Genes. *Cell* **166**,  
1329 1423-1435.e12.
- 1330 **Suvorova, E. S., Francia, M., Striepen, B. and White, M. W.** (2015). A novel  
1331 bipartite centrosome coordinates the apicomplexan cell cycle. *PLoS biology* **13**,  
1332 e1002093.
- 1333 **Tonkin, M. L., Roques, M., Lamarque, M. H., Pugniere, M., Douguet, D.,**  
1334 **Crawford, J., Lebrun, M. and Boulanger, M. J.** (2011). Host cell invasion by  
1335 apicomplexan parasites: insights from the co-structure of AMA1 with a RON2 peptide.  
1336 *Science* **333**, 463-7.
- 1337 **Waller, R. F., Keeling, P. J., Donald, R. G., Striepen, B., Handman, E., Lang-**  
1338 **Unnasch, N., Cowman, A. F., Besra, G. S., Roos, D. S. and McFadden, G. I.** (1998).  
1339 Nuclear-encoded proteins target to the plastid in *Toxoplasma gondii* and *Plasmodium*  
1340 *falciparum*. *Proc Natl Acad Sci U S A* **95**, 12352-7.
- 1341 **Ward, G. E. and Carey, K. L.** (1999). 96-Well plates providing high optical  
1342 resolution for high-throughput, immunofluorescence-based screening of monoclonal  
1343 antibodies against *Toxoplasma gondii*. *Journal of immunological methods* **230**, 11-8.

1344            **Wright, R. L., Salisbury, J. and Jarvik, J. W.** (1985). A nucleus-basal body  
1345 connector in *Chlamydomonas reinhardtii* that may function in basal body localization or  
1346 segregation. *Journal of Cell Biology* **101**, 1903-12.  
1347  
1348







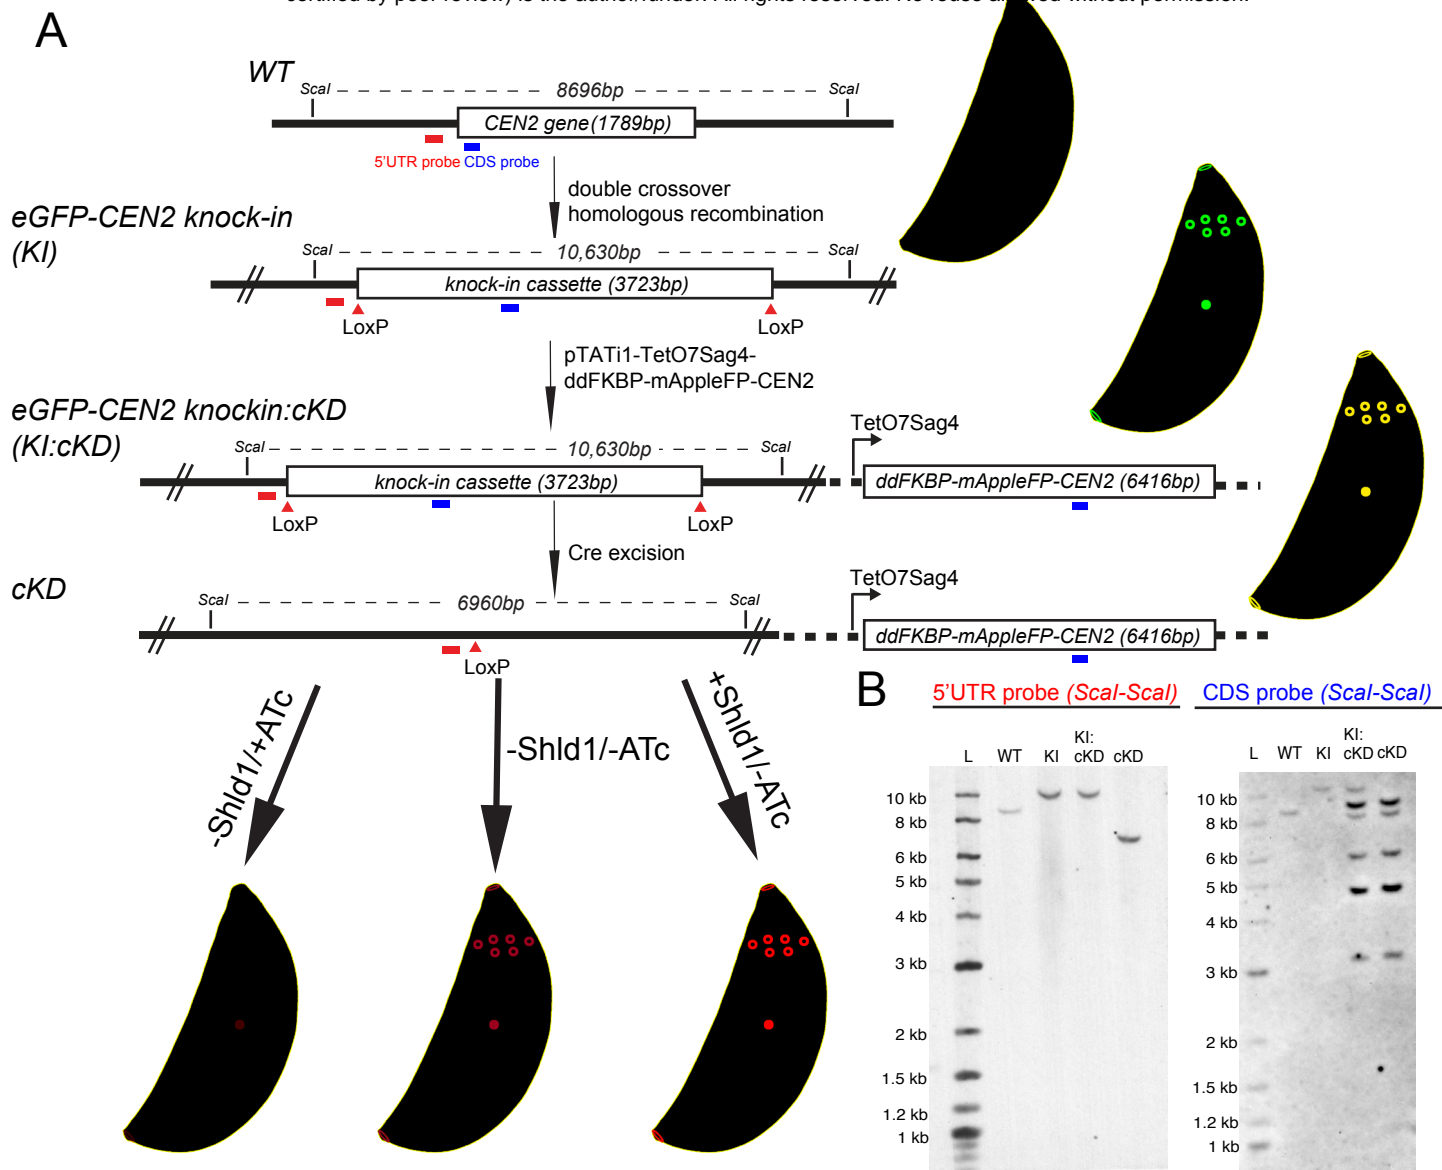

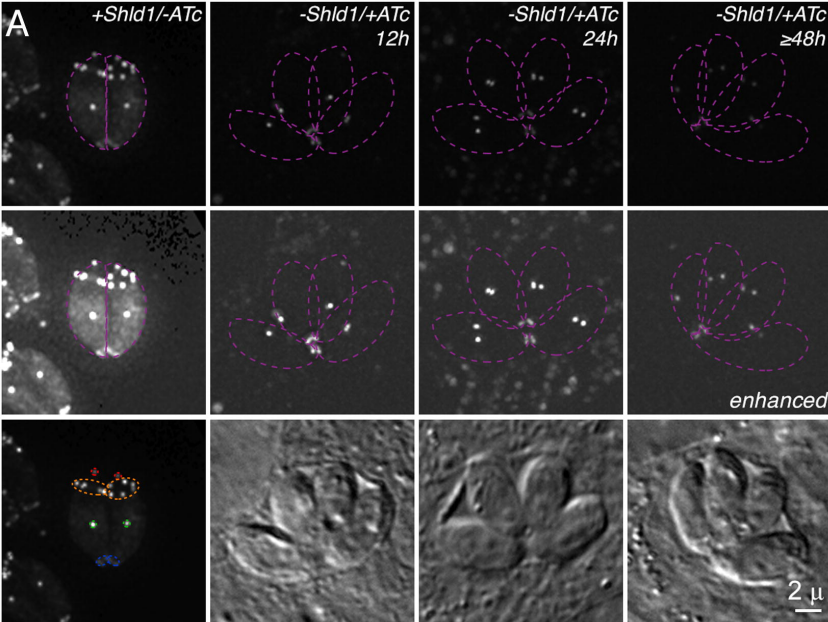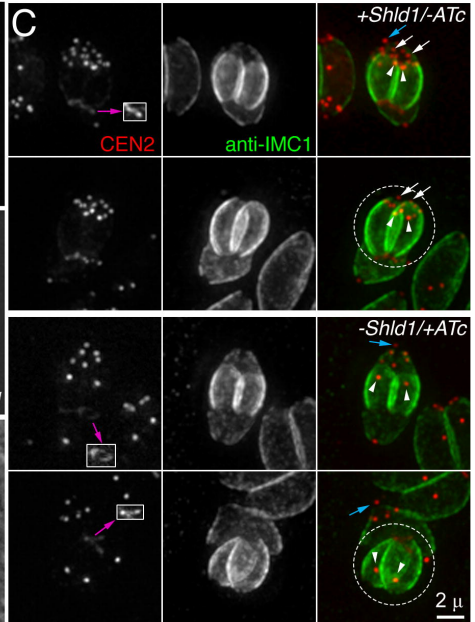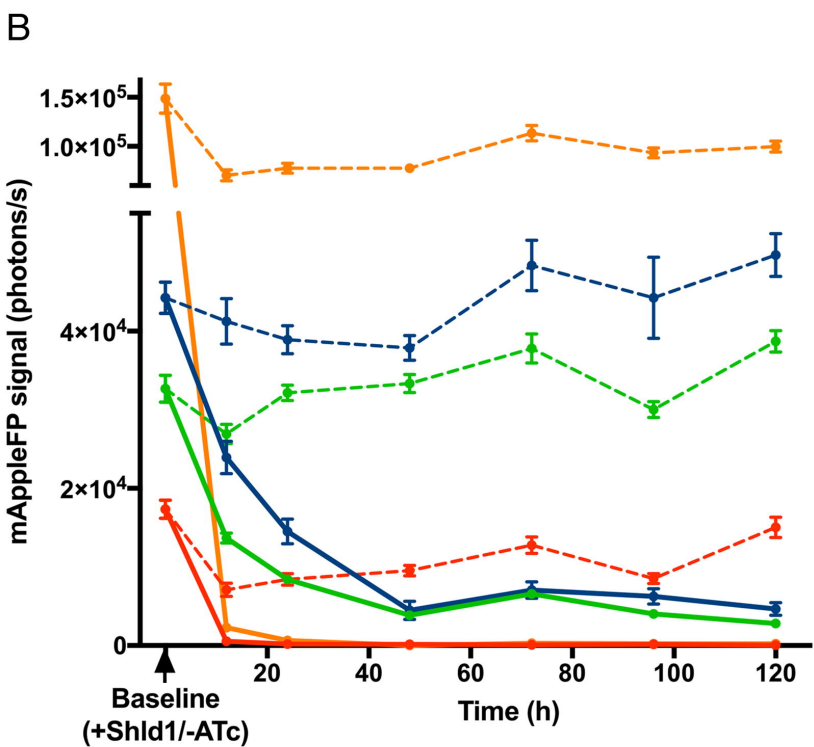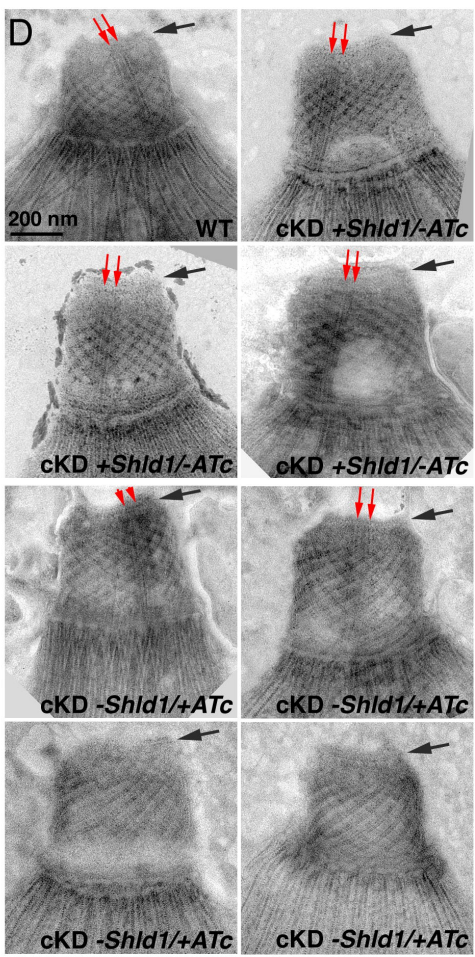

- Preconoidal rings (-Shld1/-ATc)
- Annuli (-Shld1/-ATc)
- Centriole(s) (-Shld1/-ATc)
- Basal complex (-Shld1/-ATc)
- Preconoidal rings (-Shld1/+ATc)
- Annuli (-Shld1/+ATc)
- Centriole(s) (-Shld1/+ATc)
- Basal complex (-Shld1/+ATc)

← ATc concentration during the plaque assay →

0 nM    68 nM    135 nM    270 nM    540 nM    1080 nM

KI:cKD

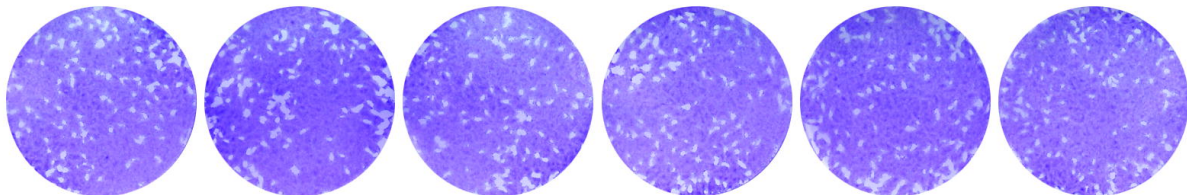

cKD

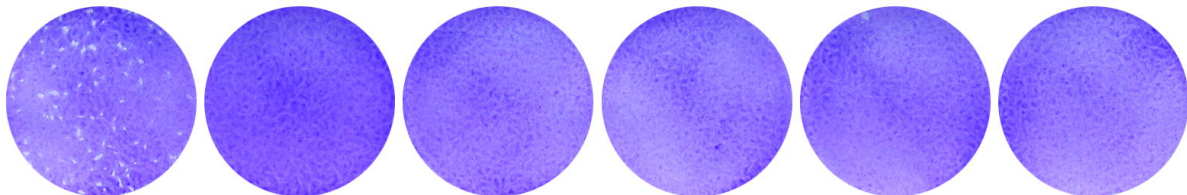

cKD  
pre-treat:  
-*Shld1*/  
-ATc

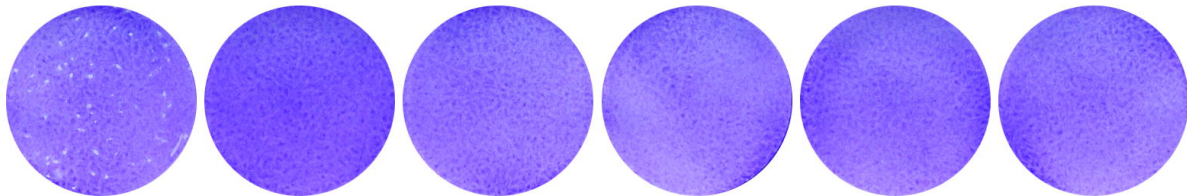

cKD  
pre-treat:  
-*Shld1*/  
+ATc

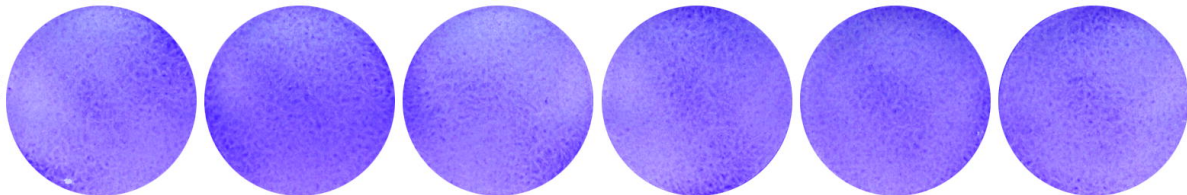

“pre-treat”: pre-treated for ~48 h with -*Shld1*/-ATc, or -*Shld1*/+ATc, prior to the plaque assay



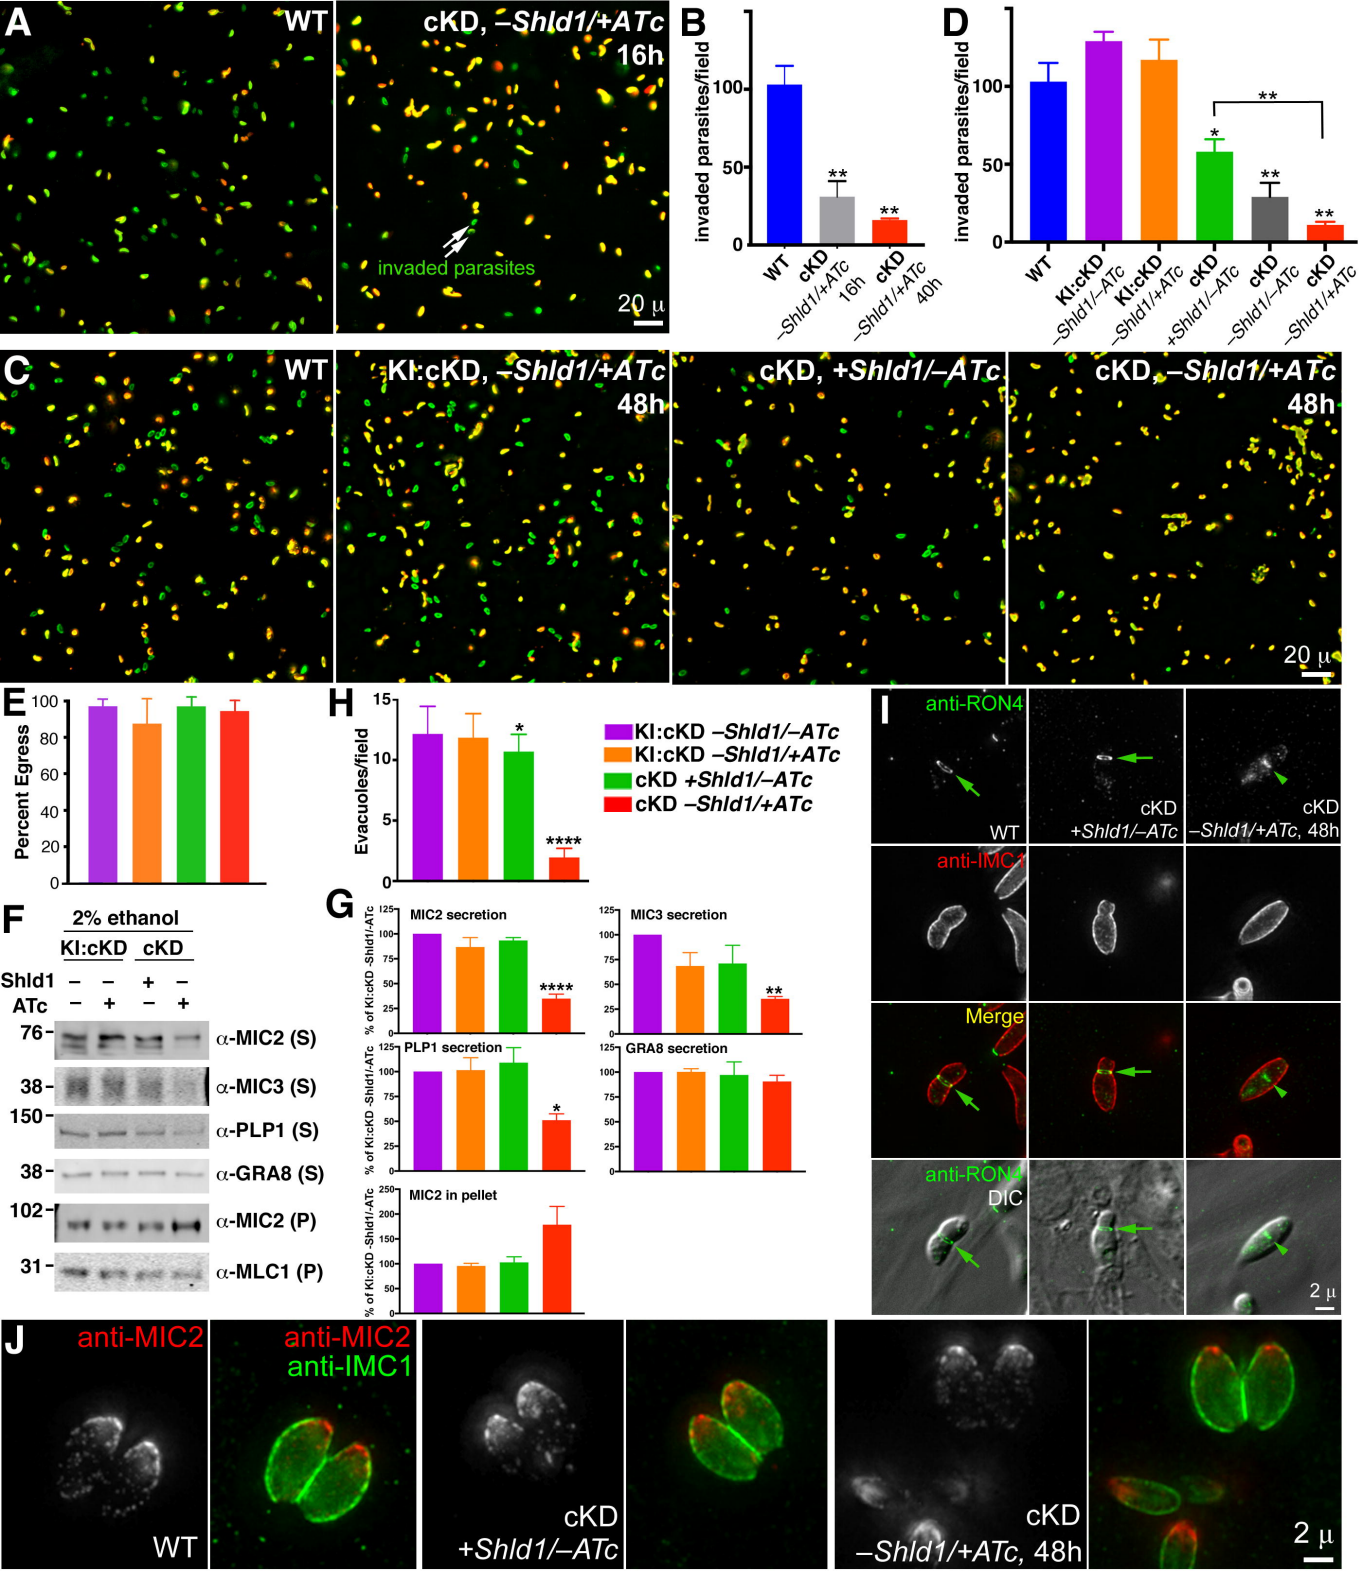

A

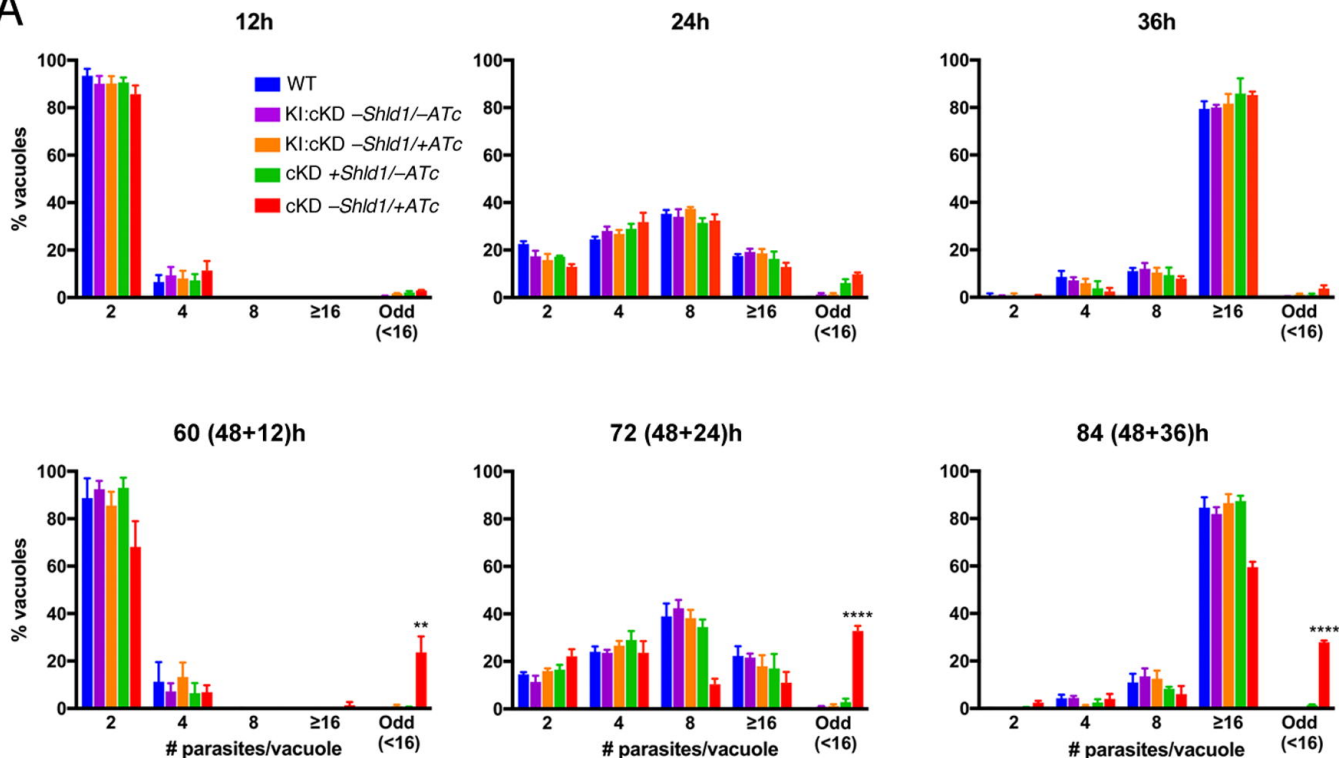

B

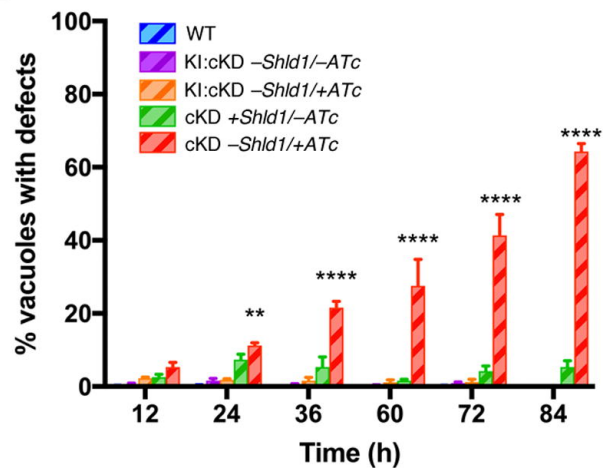

C

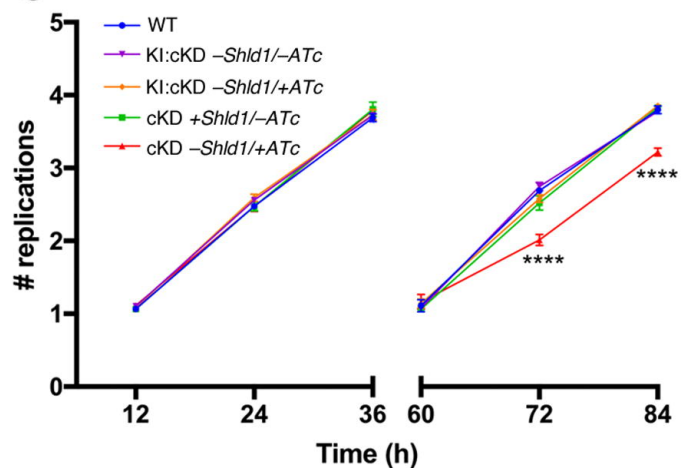



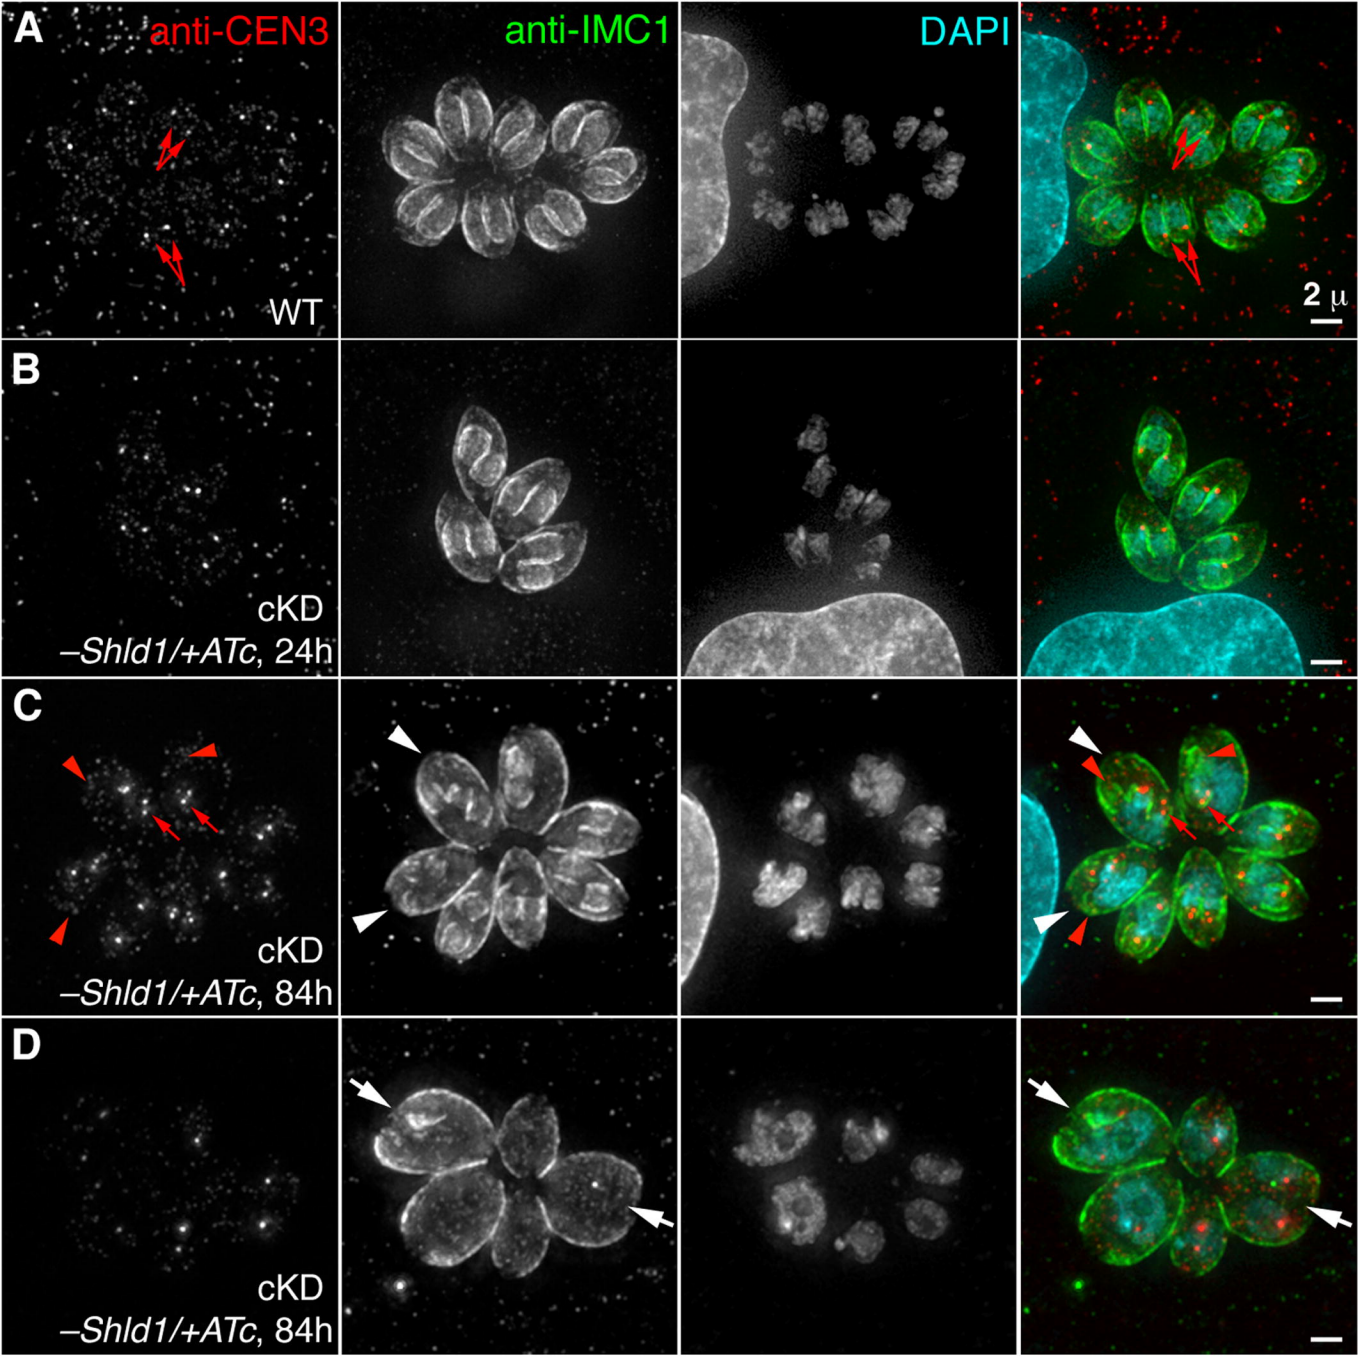

Source: https://www.biorxiv.org/content/10.1101/491316v2.full.pdf
